1

2 **Mechanical control of morphogenetic robustness in an inherently challenging environment**

3

4

5 Emmanuel Martin<sup>1</sup>, Sophie Theis<sup>1,2</sup>, Guillaume Gay<sup>2</sup>, Bruno Monier<sup>1</sup>, Christian Rouvière<sup>3</sup> and Magali  
6 Suzanne<sup>1</sup>

7

8 <sup>1</sup>LBCMCP, Centre de Biologie Intégrative (CBI), Université de Toulouse, CNRS, UPS, France

9 <sup>2</sup>Morphogénie Logiciels, 32110 St Martin d'Armagnac, France

10 <sup>3</sup>Image Processing Facility, Centre de Biologie Intégrative (CBI), Université de Toulouse, CNRS, UPS, France

11 Correspondence: [magali.suzanne@univ-tlse3.fr](mailto:magali.suzanne@univ-tlse3.fr); [guillaume@damcb.com](mailto:guillaume@damcb.com);

12 Lead Contact: [magali.suzanne@univ-tlse3.fr](mailto:magali.suzanne@univ-tlse3.fr)

13

14

15 **Abstract**

16 **Epithelial sheets undergo highly reproducible remodeling to shape organs. This**  
17 **stereotyped morphogenesis depends on a well-defined sequence of events leading to the**  
18 **regionalized expression of developmental patterning genes that finally triggers downstream**  
19 **mechanical forces to drive tissue remodeling at a pre-defined position. However, how tissue**  
20 **mechanics controls morphogenetic robustness when challenged by intrinsic perturbations in**  
21 **close proximity has never been addressed.**

22 **Here, we show that a bias in force propagation ensures stereotyped morphogenesis**  
23 **despite the presence of mechanical noise in the environment. We found that knockdown of the**  
24 **Arp2/3 complex member Arpc5 specifically affects fold directionality without altering neither**  
25 **the developmental nor the force generation patterns. By combining *in silico* modeling,**  
26 **biophysical and ad hoc genetic tools, our data reveal that junctional Myosin II planar polarity**  
27 **favors long-range force channeling and ensures folding robustness, avoiding force scattering and**  
28 **thus isolating the fold domain from surrounding mechanical perturbations.**

29

30

31

## 32 ***Introduction***

33 An intriguing characteristic of biology is the remarkable reproducibility in size and shape of a  
34 given structure from one individual to another. This trait, called robustness, is characterized by a low  
35 level of variation of a given phenotype when subjected to environmental or genetic variations  
36 (Waddington, 1942).

37 An important factor ensuring robustness is the existence of redundant mechanisms that  
38 appeared to be frequently used as a way to ensure the generation of a specific trait. It has been  
39 observed at different levels, between different genes, but also between different regulatory sequences  
40 governing gene expression with the discovery of shadow enhancers or more recently between  
41 mechanical networks governing tissue shape generation (Frankel et al., 2010; Perry et al., 2010; Smith  
42 et al., 2018; Yevick et al., 2019). These discoveries highlight the importance of backup mechanisms to  
43 ensure a correct shape. However, they did not inform on the process of canalization of a particular trait  
44 and the protection mechanisms taking place to avoid phenotypic variation in front of environmental  
45 challenges.

46 The establishment of precise patterning constitutes the initial step for the development of  
47 anatomical structures. Not surprisingly, it has been the main focus in the field to unravel the  
48 mechanisms responsible for the high level of precision observed in terms of growth, scale and  
49 patterning of tissue and organs (Félix and Barkoulas, 2015; Lander, 2011).

50 Pioneer studies came from the study of signaling gradients in *Drosophila*, highlighting the high level  
51 of precision of morphogen gradients giving rise to precise boundary of target genes expression, even  
52 when challenged by fluctuation in gene dosage or morphogen production rate (Eldar et al., 2004;  
53 Gregor et al., 2007; Hardway et al., 2008; He et al., 2008). It then became apparent that even if  
54 morphogen gradients appear amazingly robust, a certain degree of variability exists from one cell to  
55 another. This stochasticity in molecular and cellular processes emerged recently as an inherent part of  
56 biological systems, opening a whole field of research focused on how a developing organism can deal  
57 with such intrinsic noise and form stereotyped shapes (Ebert and Sharp, 2012; Gursky et al., 2012;  
58 Hong et al., 2018; Lander, 2011).

59 Numerous studies highlighted the importance to buffer this noise. Indeed, even in situations  
60 where, counter intuitively, heterogeneity has been shown to play an important role in shape robustness  
61 such as in sepal formation, heterogeneity has to be buffered over time to ensure the formation of  
62 regular and stereotyped organs (Hong et al., 2018). Different mechanisms of noise buffering have been  
63 identified, mainly involved in fine-tuning the expression of genes involved in positional information  
64 (Ebert and Sharp, 2012; Gursky et al., 2012; Herranz and Cohen, 2010; Lott et al., 2007; Manu et al.,  
65 2009; Sato, 2018).

66 Downstream of this positional information and the establishment of tissue coordinates,  
67 important drivers of tissue shape are mechanical forces, which govern cell shape remodeling and cell

68 rearrangement processes (Smith et al., 2018). The study of mechanical forces constitutes a growing  
69 field in morphogenesis, underlying their crucial role in tissue dynamics. Indeed, cells and tissues are  
70 physical entities, whose shape is determined by structural components, such as cytoskeletal proteins.  
71 Among them, the molecular motor non-muscle myosin II and the filamentous actin associate to create  
72 a dynamic network, which drives force generation or governs cell architecture. The re-distribution of  
73 acto-myosin within specific subcellular domains drives specific changes in cell shape. These forces,  
74 generated at a single cell level can propagate from one cell to another through adherens junction or  
75 diffusible biomechanical signals (Lecuit and Yap, 2015), ultimately leading to large-scale changes and  
76 tissue shape modification, although long-range propagation and channeling of mechanical forces  
77 remains largely unexplored.

78         If the cellular machinery responsible for force generation is a key player in the construction of  
79 a particular shape, only a few works addressed the question of mechanical contribution to robustness.  
80 On the one hand, Hong and colleagues (Hong et al., 2018) proposed, based on theoretical modeling,  
81 that tissue mechanics could buffer the heterogeneity observed at a single cell level in term of growth  
82 and stiffness. More recently, this idea has been tested experimentally and mechanical forces have been  
83 shown to buffer local heterogeneity both in zebrafish and in *Drosophila* (Akieda et al., 2019; Eritano  
84 et al., 2020). On the other hand, Yevick and colleagues (Yevick et al., 2019) identified redundant  
85 mechanical networks involved in the construction of a particular shape. However, despite an important  
86 amount of works on mechanical forces as essential bricks in the construction of tissue shape, how  
87 mechanics affects the degree of variability of a given phenotype in challenging environmental  
88 conditions remain mostly unexplored. Indeed, while the generation and the propagation of forces are  
89 well recognized as an important property of cells and tissues, they are mainly viewed as key  
90 executioners of a pre-established developmental program or as a refining mechanism of intrinsic noise  
91 rather than a guardian of the stereotypic nature and robustness of tissue shape in front of external  
92 challenges.

93         Here, focusing on tissue invagination as a model of morphogenetic robustness, we identified  
94 a genetic condition in which fold orientation, an extremely robust trait, becomes highly variable. This  
95 variability appears to be independent of tissue patterning; with both tissue regionalization and intrinsic  
96 mechanical signals occurring normally, while fold directionality is perturbed. These deviations point  
97 at regions of high tension, which appear randomly around the fold domain, thus revealing the presence  
98 of mechanical noise in the local environment. Finally, we found that Myosin II planar polarity is both  
99 necessary and sufficient to ensure the robustness of fold directionality, favoring force channeling, and  
100 thus protecting the invagination from neighboring mechanical noise.

101

## 102 ***Results***

### 103 **Morphogenesis variability in *Arpc5* knockdown.**

104 To address the role of tissue mechanics in morphogenetic robustness, we used *Drosophila* leg  
105 development, a model particularly appropriate since it undergoes a highly stereotyped morphogenesis  
106 with four parallel folds formed during development, in the most distal part of the leg or tarsal region  
107 (Fig1a). To quantify the robustness of this morphogenetic process in a control situation, we measured  
108 the variability of fold positioning (distance from the predicted fold), fold orientation (angle formed  
109 with the proximal-distal axis of the leg) and further quantified the relative orientation of tarsal folds  
110 between them or fold parallelism (Fig1c-f, control). Both fold positioning and orientation appear to be  
111 extremely robust in the control situation, as shown by the low standard deviation observed for each of  
112 these parameters.

113 To decipher how this particular shape is established and maintained from one individual to  
114 another, we selected, from an unbiased screen expressing a library of RNAi in the tarsal domain of the  
115 leg (manuscript in preparation), candidates affecting specifically fold positioning. Interestingly, we  
116 found a puzzling phenotype, never described before, of misoriented folds. This phenotype was found  
117 for several components of the Arp2/3 complex known to regulate the branched actin network,  
118 including Arpc5, Arpc3a and Arp2 (Fig1b, S1b) (Chesarone and Goode, 2009; Pollard and Beltzner,  
119 2002; Robinson et al., 2001). Interestingly, defects show a wide range of variability and ranged from a  
120 complete absence of folds to fold deviation to normal folding (FigS1b-c). Since these proteins are all  
121 part of the core Arp2/3 complex and their RNAi give similar phenotypes (FigS1b-c), we focused our  
122 analysis on one of them, Arpc5, whose inactivation by RNAi in our experimental conditions resulted  
123 in a 50% reduction of its mRNA level (FigS1a). The implication of Arp2/3 in fold directionality was  
124 unexpected. To further characterize this new phenotype, we first compared the defects observed  
125 during fold formation and at the end of the process. We observed an increase in the proportion of fold  
126 deviation over time, going from 1/3 to 3/4. These results indicate that the deviations are not transient  
127 but stable defects. We further observed that the absence of folding becomes less frequent with time,  
128 suggesting together with the increase of fold deviations that a proportion of folds are delayed and  
129 finally misoriented (FigS1c). To further characterize this mutant phenotype, we choose to focus on  
130 mid-fold formation, a stage at which fold positioning can be defined more accurately. We then  
131 measured the variability of fold positioning, fold orientation and fold parallelism of the subpopulation  
132 of discs (about 2/3) displaying normal or misoriented folds (Fig1c-f), and excluding unfolded legs  
133 since fold direction is impossible to address in these ones (mentioned as flat in FigS1c). For each of  
134 these parameters, standard deviation was significantly higher than in the control, highlighting the high  
135 degree of variability observed in the Arpc5 knockdown condition (Fig1c-f), a phenotype characteristic  
136 of a failure of morphogenetic robustness.

137

138 **Developmental patterning in Arpc5 knockdown**

139           Although the regulation of fold orientation has never been addressed, fold positioning is  
140 known to be determined by the sequential establishment of positional information along the  
141 developing leg tissue, starting with the restricted expression of morphogens such as *wingless* and  
142 *decapentaplegic* (Lecuit and Cohen, 1997), the subsequent proximal-distal regionalization through the  
143 expression of patterning genes such as *Hth*, *Dac* and *Dll* (Wu and Cohen, 1999), followed by the  
144 segmental activation of the Notch pathway in the distal part of each segment (de Celis et al., 1998;  
145 Rauskolb and Irvine, 1999). Finally, in the tarsal region, pro-apoptotic genes are expressed in a few  
146 rows of cells in the distal part of each segment (Manjón et al., 2007). This positional information is  
147 then translated into a “patchy” pattern of apoptotic cells in the predicted fold domain. Previous work  
148 that reconstituted the localization of apoptotic cells in fixed samples over time showed that apoptotic  
149 cells appear first on the ventral part, then in the lateral domains, and finally in the most dorsal domain  
150 of this ring-shaped predicted fold (Monier et al., 2015). Before their elimination, these apoptotic cells  
151 exert apico-basal forces, which constitute the initiator mechanical signals for tissue remodeling. These  
152 forces are transmitted to their neighbors leading to an increase in apical myosin accumulation, apical  
153 constriction and eventually tissue folding, a process that lasts 3-4h *in vivo* (Monier et al., 2015).

154           Since robustness has been shown to rely on the establishment of robust positional information,  
155 we first analyzed the expression pattern of genes known to be involved in fold positioning.  
156 Importantly, in the *Arpc5* knockdown condition, the segmental activation of Notch, characterized by  
157 the expression of the Notch target gene *Deadpan* (*Dpn*), is maintained (Fig2a). Indeed, on top of *Dpn*  
158 expression in neurons (see asterisks in Fig2a), consistent with its identification as a pan-neural gene  
159 (Younger-Shepherd et al., 1992), *Dpn* is expressed in stripes in the distal leg, both in the control and  
160 *Arpc5* RNAi condition. We further characterized *Dpn* expression domain and found that the width of  
161 its domain is slightly smaller in *Arpc5* RNAi (FigS2d), consistent with the role played by Arp2/3 in  
162 Notch activation in other contexts (Rajan et al., 2009). However, the orientation of *Dpn* stripes in  
163 relation to the proximal-distal axis, their parallelism and their curvature were unaffected in *Arpc5*  
164 knockdown condition (Fig2c; FigS2a,c). Fold deviation in the *Arpc5* knockdown appears to result  
165 from a partial dissociation of the folding process from the positional information. Thus, while folds  
166 follow the segmental stripes of Notch activation domain in the control, folds deviate from these  
167 positional cues in the *Arpc5* knockdown (Fig2e-f, MovieS1 and S2). We next analyzed the apoptotic  
168 pattern in the *Arpc5* knockdown, which appears intact as shown by the unperturbed expression of the  
169 pro-apoptotic gene *reaper* (Fig2b,d; FigS2b,e,f) and the frequency of apoptotic cells in the fold  
170 domain (Fig2g). Finally, the ability of dying cells to generate mechanical signals is identical to the  
171 control, as shown by the formation of apico-basal transient structures of Myosin II in dying cells  
172 (Fig2h), their ability to deform the apical surface (Fig2h) and to generate apico-basal tension (Fig2i,  
173 MovieS3). Thus, while folds deviate in *Arpc5* knockdown condition, positional information resulting  
174 from the developmental patterning and the subsequent mechanisms known to be involved in the fold  
175 formation are unaffected. This surprising result prompted us to revisit the prevailing model of

176 morphogenetic robustness relying on strict regulation of morphogen gradients or key identity genes  
177 (Gilmour et al., 2017). We hypothesized that fold deviation could either be due to the appearance of a  
178 new source of perturbation or by an increased sensitivity to existing perturbations in the knockdown  
179 condition.

180

### 181 **Leg morphogenesis occurs in a mechanically noisy environment.**

182 We next asked if folds deviate towards particular regions of the tissue in Arpc5 knockdown.  
183 We noticed that misoriented folds deviate from the predicted fold domain to more proximal or distal  
184 regions (Fig3a). Proximally, deviated folds often joined a straight cellular alignment present at the  
185 distal border of Notch activation (Fig3b, FigS3a) while distally deviated folds frequently headed  
186 towards apico-basal structures of Myosin II (Fig3d) that are not associated with apoptosis (FigS3b)  
187 and are present at various distances from the predicted fold domain. Importantly, both regions are  
188 strongly enriched in Myosin II, either apically or apico-basally, which usually coincides with high  
189 tension. Laser ablation experiments showed that tension was indeed significantly higher at the “Notch  
190 border” and at non-apoptotic apico-basal myosin structures (Fig3c, e), compared to the neighboring  
191 tissue in Arpc5 knockdown condition. Altogether, these data indicate that, when Arpc5 function is  
192 reduced, folds head towards regions of high tension. This suggests that these regions of high tension  
193 could create mechanical perturbations in close vicinity to the fold domain.

194 To figure out whether the potential mechanical interference associated with structures under  
195 high tension are either ectopically created or increased following the Arpc5 knockdown, or,  
196 alternatively, present yet masked during normal development, we analyzed the Myosin II pattern in  
197 control flies. Interestingly, both the “Notch border” and non-apoptotic apico-basal myosin structures  
198 were present in the control (Fig3b,d, FigS3) and the tension borne by these structures was comparable  
199 to that measured in Arpc5 knockdown condition (Fig3c,e, MovieS4). To further characterize tissue  
200 mechanics around the fold region, we mapped these regions of high tension and found that these  
201 mechanical perturbations are frequent and located at variable positions around the fold domain both in  
202 the control and in Arpc5 knockdown condition, suggesting the existence of a mechanical noise during  
203 fold morphogenesis (Fig3f). Altogether, these data suggest that leg fold morphogenesis is permanently  
204 challenged by surrounding remodeling events and becomes more sensitive to mechanical perturbations  
205 in the Arpc5 knockdown.

206 To test the impact of mechanical perturbations on fold formation, we turned to *in silico*  
207 modeling. We previously developed a vertex model able to reproduce leg fold formation both in terms  
208 of tissue shape and cellular organization (Monier et al., 2015). However, this morphogenetic event  
209 was considered as an isolated process in these simulations, and the only mechanical forces applied  
210 were those originating from the apoptotic cells located in the predicted fold domain. Therefore, we

211 implemented the model (see M&M and FigS4) and integrated random mechanical perturbations in  
212 close vicinity to the predicted fold domain, mimicking the mechanical noise observed *in vivo* (Fig3h).  
213 Interestingly, mechanical noise appears sufficient to induce fold deviations in the simulations,  
214 mimicking the Arpc5 knockdown condition (Fig3g). We further quantified the variability of the  
215 phenotype observed when a random pattern of mechanical perturbations was integrated in the model  
216 and found that, while fold formation appeared robust in the absence of potential interferences, fold  
217 positioning and orientation become consistently more variable in the presence of mechanical  
218 perturbations in the vicinity of the predicted fold domain (Fig3i-j).

219 Altogether, these results strongly suggest that some kind of isolation is required between the  
220 fold domain and the neighboring tissue to avoid surrounding mechanical interference and ensure  
221 morphogenetic robustness.

222

### 223 **Arp2/3 controls Myosin II planar polarization**

224 We next asked how the predicted fold domain could become insensitive to nearby mechanical  
225 noise. Strikingly, in the control we noticed that Myosin II bore a polarized junctional distribution  
226 specifically in the fold domain, with a stronger accumulation in the cellular junctions parallel to the  
227 future folds (or circumferential junctions) than in perpendicular ones (or proximal-distal junctions).  
228 This polarity, although already present at the onset of fold formation, is accentuated during fold  
229 progression and coincides with an increase of cell anisotropy (Fig4a-d). Importantly, while the total  
230 amount of Myosin II was unchanged in Arpc5 knockdown condition (FigS5a), Myosin II planar  
231 polarity was lost and cell anisotropy was no more increased in the fold domain (Fig4a-d). These  
232 observations show that folding robustness coincides with planar polarization of Myosin II in the fly  
233 leg.

234 To decipher how Arp2/3 could drive Myosin II planar polarity, we first characterized the  
235 spatial distribution of the F-actin network (using phalloidin) and of the Arp2/3 complex (using UAS-  
236 Arp3-GFP, a construct whose expression does not induce any visible defect, see FigS5b).  
237 Interestingly, we observed a polarized and anti-correlative distribution between F-actin and the Arp3-  
238 GFP fusion protein. While F-actin was preferentially accumulated in junctions parallel to the fold like  
239 Myosin II, Arp3-GFP was mainly present in junctions perpendicular to the fold (Fig5a-d).  
240 Interestingly, the polarized distribution of F-actin is lost in Arpc5 RNAi condition, indicating a role of  
241 Arp2/3 in F-actin polarity.

242 We further characterized the flows of the medio-apical Myosin II and observed a slight bias in  
243 its directionality in the control, with more movement in the proximo-distal axis than in the  
244 circumferential one (FigS5e). Interestingly this bias is lost in Arpc5 knockdown (FigS5f), suggesting  
245 that Arp2/3 could influence Myosin II polarity through the regulation of medio-apical myosin flow.

246 Finally, we observed a slight polarity in the distribution of adherens junctions (using  $\beta$ -  
247 catenin-GFP), with enrichment similar to Arp2/3. However, this polarity is unperturbed in Arpc5  
248 knockdown (FigS5c-d).

249

## 250 **Planar polarity ensures morphogenetic robustness**

251 To test if perturbing Myosin II planar polarity was sufficient to alter fold robustness *in vivo*, we  
252 decided to disrupt Myosin II polarity by an independent method. We generated a new variant of the  
253 nanobody-based GFP-trap technique previously described (Harmansa et al., 2017; Harmansa et al.,  
254 2015), which traps the endogenous Myosin II-GFP fusion protein (Myosin Regulatory Light Chain,  
255 MRLC-GFP) at adherens junctions (Fig6a-b, FigS6a, see M&M). We found that the distribution of  
256 junctional Myosin II is mainly isotropic in this condition, although not totally homogeneous.  
257 Interestingly, using conditional expression of this AJs-GFP-trap construct in the presence of Myosin  
258 II-GFP, we frequently observed deviated folds, mimicking the defects observed in the Arpc5  
259 knockdown (Fig6c), while expression of AJs-GFP-trap in the absence of any GFP does not alter leg  
260 morphogenesis (FigS6b). We also observed that the variability of fold positioning, fold orientation and  
261 fold parallelism was significantly increased in this condition of Myosin II polarization defect  
262 compared to the control (Fig6d-f). These experiments show that decreasing or abolishing Myosin II  
263 planar polarity through two independent strategies (Arpc5 knockdown and AJs-GFP-trap/Myosin II-  
264 GFP) leads to an increase of variability of fold orientation in the fly leg.

265 We then wondered whether restoring Myosin II polarity in a non-polarized tissue could rescue  
266 the defects of fold deviation. Although not feasible *in vivo*, we could address this question using *in*  
267 *silico* modeling, asking whether fold deviation caused by local mechanical perturbations (see Fig3g)  
268 could be rescued by the introduction of planar polarized junctional Myosin II. In order to integrate  
269 Myosin II planar polarity in the model, we first checked if tension pattern could be inferred by myosin  
270 distribution in this tissue. Using laser ablation, we found that circumferential junctions bear more  
271 tension than proximal-distal junctions in the control, while tension appears independent of junction  
272 orientation in Arpc5 knockdown (FigS7a-b), consistent with the respective distributions of Myosin II  
273 observed in these conditions. We then mimicked Myosin II planar polarity and the associated tension  
274 anisotropy by the attribution of different values of junctional tension depending on junction orientation  
275 in our model (see M&M and FigS7c-e). Fold robustness was unaffected by the integration of tension  
276 polarity in the model in the absence of external perturbations (FigS7f), while interestingly, gradual  
277 increase of tissue polarity favors fold straightness and insensitivity to surrounding perturbations  
278 (Fig6g). We further quantified fold morphogenetic robustness in our theoretical model for different  
279 degrees of polarity. Interestingly, increasing polarity decreases the degree of deviation of the fold and  
280 thus decreases the variability in fold directionality (Fig6h-i and FigS7g-h). Altogether, *in vivo*



281 manipulations and *in silico* modeling indicate that the planar polarization of tissue tension favors  
282 mechanical isolation of fold formation, which ultimately ensures morphogenetic robustness.

283

#### 284 **Planar polarity favors directional force transmission.**

285 We then asked how planar polarity of Myosin II and the associated polarized tension could  
286 protect morphogenesis from surrounding mechanical disturbances, ensuring robust fold formation.

287 We first performed laser ablation at the level of a tricellular junction in the fold domain and  
288 followed the recoil of vertices in the neighboring tissue, along several cell diameters (Fig7a). We  
289 observed stronger recoil in the direction of the fold in the control (Fig7b-c). On the contrary, in the  
290 Arpc5 knockdown condition, recoil of vertices up to 3-4 cell diameters becomes similar irrespective of  
291 the direction (Fig7d-e). This experiment reveals the existence of an anisotropic multicellular  
292 mechanical coupling, which results in tissue-scale tension anisotropy.

293 We hypothesized that Myosin II polarized distribution could generate a bias in long-range  
294 force transmission, avoiding force scattering across the tissue. To specifically test how discrete forces,  
295 generated locally, are transmitted along the tissue, we used wound healing as a way to generate local  
296 forces in a spatio-temporally controlled manner (Fernandez-Gonzalez and Zallen, 2013). We next  
297 analyzed the propagation of forces across the tissue. We wounded the tissue locally by laser ablation at  
298 the level of a tricellular junction, waited for the tissue to repair, and as soon as the healing started  
299 generating local forces, performed a circular cut around the healing region and observed the recoil  
300 (Fig7f-g, + ectopic force, bottom). A similar experiment in the absence of a preliminary wound gave  
301 access to the steady state pattern of tensions within the leg tissue (Fig7f-g, steady state, top row).  
302 Thus, in the absence of wound, the internal release ( $d^*$ ) depends on the tension, or residual stress,  
303 present in the circular isolated tissue fragment, while the external release ( $d$ ) depends on the tension  
304 present in the rest of the tissue. In the presence of wound-healing traction force, the internal release  
305  $dw^*$  mostly depends on both the residual stress present in the circular tissue fragment ( $F_{int}$ ) plus the  
306 wound-healing traction force ( $F_w$ ), while the external release  $dw$  mostly depends on both residual  
307 stress in the whole tissue ( $F_{ext}$ ) plus force transmission ( $FW_{tr}$ ). This allows us to estimate the wound-  
308 healing traction force by comparing  $dw^*$  and  $d^*$ , while we can estimate the transmission of forces  
309 created in response to healing by comparing  $dw$  and  $d$ .

310 We first analyzed internal recoil and observed that while the recoil is isotropic in the absence  
311 of Myosin II planar polarity (compare  $dw^*_{PrDi}$  and  $dw^*_{Circ}$  in Arpc5 RNAi, Fig7h), it is anisotropic in  
312 the presence of Myosin II planar polarity (compare  $dw^*_{PrDi}$  and  $dw^*_{Circ}$  in control, Fig7h). This  
313 anisotropy suggests that the traction force due to the healing ( $F_w$ ) could be anisotropic in the control.  
314 Regarding the external recoil, without wound healing, circular cutting induced an ovoid-shaped recoil,

315 indicating that tissue tension was stronger in the circumferential axis in the wildtype condition, while  
316 it results in circular recoil in Arpc5 RNAi condition, indicating that tension anisotropy was lost  
317 (compare  $d_{PrDi}$  to  $d_{Circ}$  in control and  $d_{PrDi}$  and  $d_{Circ}$  in Arpc5 RNAi in Fig7i). In the presence of wound  
318 healing, the tendency is the same (compare  $d_{WPrDi}$  and  $d_{WCirc}$  in control and  $d_{WPrDi}$  and  $d_{WCirc}$  in Arpc5  
319 RNAi in Fig7i). Interestingly, while an increase in internal recoil is visible both in proximo-distal and  
320 circumferential axis in the presence of wound (compare  $d^*_{PrDi}$  with  $dw^*_{PrDi}$  and  $d^*_{Circ}$  with  $dw^*_{Circ}$  in  
321 the control and Arpc5 RNAi in Fig7h), the external recoil is specifically accentuated along the  
322 circumferencial axis in the presence of Myosin II planar polarity (compare  $d_{Circ}$  with  $dw_{Circ}$  and  $d_{PrDi}$   
323 with  $dw_{PrDi}$  in control, Fig7i). Thus, even if initial wound healing traction force might be anisotropic,  
324 these experiments allow us to propose that in the presence of Myosin II planar polarity, forces (both  
325 traction forces and forces transmitted in response) are transmitted preferentially in the circumferential  
326 direction (in dark grey in Fig7h-i). On the contrary, in the absence of Myosin II planar polarity, no  
327 significant increase in external recoil is observed (compare  $d_{Circ}$  and  $dw_{Circ}$  as well as  $d_{PrDi}$  and  $dw_{PrDi}$  in  
328 Arpc5 RNAi, Fig7i), showing that forces might spread homogeneously around the wound healing  
329 region in this condition (in dark blue in Fig7h-i).

330 Altogether, these experiments indicate that forces are not homogeneously transmitted in the junctional  
331 plane of the tissue but are rather channeled in the presence of Myosin II planar polarity.

332

### 333 *Discussion*

334 Our study provides direct evidence of a mechanism protecting morphogenesis from  
335 environmental perturbations, ensuring tissue shape robustness on top of developmental patterning  
336 through the channeling of mechanical forces. This mechanism involves Arp2/3 complex, which  
337 controls junctional tension anisotropy through Myosin II planar polarity, and avoid apical force  
338 scattering, thus favoring force transmission along the circumferential axis. This ultimately provides  
339 resistance to mechanical perturbations that appear randomly in the surrounding tissue and create a  
340 mechanically noisy environment.

341 Our work reveals that Arp2/3 complex plays a crucial role in establishing a planar polarized  
342 distribution of Myosin II in the developing leg tissue. We explored several hypotheses to explain the  
343 involvement of Arp2/3 in Myosin II planar polarity. Arp2/3 has been related to E-cadherin endocytosis  
344 (Georgiou et al., 2008). By favoring E-cadherin endocytosis at junctions, it could indirectly impact  
345 Myosin II polarity. However, adherens junction polarity is not perturbed in Arp2/3 knockdown, ruling  
346 out this hypothesis. Myosin II planar polarity in the embryo depends on medial-apical flows of acto-  
347 myosin (Rauzi et al., 2010). Consistently, we observed a slight bias in the directionality of medial-  
348 apical myosin flow in the control that is lost in Arpc5 knockdown. This indicates that Arp2/3  
349 influences Myosin flow, however, these results are complex and require further investigation. Finally,

350 Arp2/3, which is involved in the formation of branched actin network, is enriched in the junctions that  
351 are perpendicular to the fold, while F-actin is more abundant in circumferential junctions. This  
352 suggests that the distribution and the density of F-actin networks is itself polarized and that proximo-  
353 distal junctions are enriched in branched actin, while circumferential junctions would be enriched in  
354 linear actin. Since Myosin II has been observed to preferentially accumulate with linear actin network  
355 (Michelot and Drubin, 2011), this polarity of the actin networks would favor the accumulation of  
356 Myosin II along circumferential junctions and thus drive Myosin II planar polarity.

357 This work also highlights that Myosin II planar polarity could protect a morphogenetic process  
358 from the surrounding noise, by playing a role in long-range force channelling and forming a sort of  
359 mechanical fence. Myosin II planar polarity has been described in different contexts: germ band  
360 extension in *Drosophila* embryo where it drives tissue elongation (Bertet et al., 2004), but also neural  
361 tube closure in chicken (Nishimura et al., 2012), where it favors polarized junction shortening and  
362 tissue folding, or at compartment boundaries in *Drosophila* and zebrafish where it maintains a straight  
363 borders (Calzolari et al., 2014; Major and Irvine, 2006; Monier et al., 2010). However, its role in the  
364 protection of morphogenesis from external perturbations was unexpected. Indeed, so far, most of the  
365 studies related to morphogenetic robustness converge on the regulation of gene expression patterns in  
366 response to morphogen gradients and consider acto-myosin either as a component of the “core  
367 toolbox” responsible for building a new shape or as a mechanism to buffer local heterogeneity in  
368 positional information by exerting a feedback on cell-fate decisions (Gilmour et al., 2017). However,  
369 the influence of tissue mechanics in maintaining low variability of a specific shape when challenged  
370 by intrinsic perturbations in close proximity was unexplored.

371 Interestingly, two recent papers addressed the robustness of tissue invagination. While the  
372 work of Yevick et al highlights the importance of mechanical redundancy to resist to accidental  
373 damage (Yevick et al., 2019), Eritano et al reveal the role of mechanical coupling as an intrinsic  
374 property of morphogenesis to buffer small variability in gene expression patterns (Eritano et al., 2020).  
375 The present study appears complementary to these previous works, showing how morphogenesis is  
376 naturally protected from mechanical perturbations occurring randomly in the surroundings, by creating  
377 a fence through Arp2/3-dependent junctional myosin II planar polarity. It further reveals that tissue  
378 mechanics not only buffer genetic information but can take over the positional information given by  
379 patterning genes since folds can considerably deviate from the pre-established program if forces are  
380 not properly channeled.

381 Finally, this work further reveals that fold morphogenesis in the *Drosophila* developing leg occurs  
382 in the presence of mechanical noise, as shown by mechanical perturbations randomly distributed in the  
383 developing tissue at the time of fold formation. Since the occurrence of several developmental  
384 processes in the same time window is frequently observed during development, it is tempting to

385 speculate that mechanical noise could be a general feature of morphogenesis and that mechanical  
386 isolation could be required in a wide variety of morphogenetic processes to avoid force scattering and  
387 maintain morphogenetic robustness. Thus, this process of force channeling through Myosin II  
388 polarized distribution could be a general way to isolate a particular morphogenetic process from  
389 surrounding events, preventing any interference between closely located events and favoring  
390 robustness.

391

392

### 393 ***Acknowledgements***

394 We thank Michel Labouesse and Yohanns Bellaïche for their constructive comments on the  
395 manuscript. MS's lab is supported by grants from the European Research Council (ERC) under the  
396 European Union Horizon 2020 research and innovation program (grant number EPAF: 648001), from  
397 the Institut National de la Santé et de la Recherche Médicale (Inserm, Plan cancer 2014-2019) and  
398 from the association Toulouse Cancer Santé (TCS, ApoMacImaging: 171441). EM has a post doc  
399 fellowship from the Association pour la Recherche contre le Cancer (ARC). ST has a CIFRE  
400 fellowship from the ANRT.

401

### 402 ***Author contributions***

403 EM conceived and performed the experiments in fly leg discs. ST participated in modeling conception  
404 and realized all the simulations. EM and ST analyzed and quantified the data. BM initiated the project,  
405 participated in experimental conception and article writing. GG supervised the modeling conception.  
406 MS supervised the project, wrote the paper and provided the funding. CR helped with the analysis of  
407 Rpr and Dpn pattern, and PIV analysis.

408

### 409 ***Competing interest declaration***

410 The authors declare no competing financial interests.

411

### 412 ***Corresponding authors***

413 Correspondence and requests should be addressed to M.S. ([magali.suzanne@univ-tlse3.fr](mailto:magali.suzanne@univ-tlse3.fr)) for biology  
414 and materials and to G.G. ([guillaume@morphogenie.fr](mailto:guillaume@morphogenie.fr)) for modeling.

415

416 **Main figure titles and legends**

417

418 **Figure 1: Fold morphogenetic robustness is lost in Arpc5 knockdown (related to FigS1).**

419 **a-b**, 3D reconstructions of a *control* (*Dll-Gal4; arm-GFP*) (**a**) or *Arpc5* RNAi (*Dll-Gal4; arm-GFP, UAS Arpc5RNAi*)  
420 (**b**) pupal leg discs at 1h30 after puparium formation (APF), showing tarsal folds morphology in blue. **c**, Dot  
421 plots showing the maximal distance between the real folds and the corresponding predicted fold (highlighted  
422 in yellow) in *control* and *Arpc5* RNAi leg discs (n=35, 63, respectively). **d**, Dot plots showing the angle of the  
423 folds relative to the proximal-distal axis in *control* and *Arpc5* RNAi discs (n=35 in both cases). **e**, Dot plots  
424 quantifying the fold parallelism (ratio between the angles of two different folds) in *control* and *Arpc5* RNAi leg  
425 discs (n=35 in both cases). In **c-e**, a *F*-test of equality of variances was used. ns, not significant; \*\*\*, p-value <  
426 0.001. Black lines represent the mean  $\pm$  SD. Genotypes correspond to *sqh-RFPt[3B]; Dll-Gal4, UAS-GC3Ai*  
427 uncrossed or crossed to *UAS Arpc5RNAi*.

428 **Figure 2: Developmental patterning is unaffected in Arpc5 knockdown (Related to FigS2 and Movie S1-S3)**

429 **a**, Z-sections of *control* (*sqh-GFP[29B]; Dll-Gal4*) and *Arpc5* RNAi (*sqh-GFP[29B]; Dll-Gal4; UAS-Arpc5RNAi*) leg  
430 discs stained with phalloidin (white) and showing Z-projection of anti-Deadpan (magenta). **b**, Z sections of  
431 *control* (*rpr-lacZ; Dll-Gal4*) or *Arpc5* RNAi (*rpr-lacZ; Dll-Gal4; UAS-Arpc5RNAi*) leg discs stained with phalloidin  
432 (white) and showing a Z-projection of *rpr-lacZ* (yellow). **a,b**, Yellow, blue and green arrowheads respectively  
433 indicate predicted fold, real fold and perfect match between them. Please note that both *Dpn* and *rpr-lacZ* are  
434 also expressed in some neurons, indicated by asterisks. Cartoons on the right recapitulate the location of Notch  
435 signaling (purple) and pro-apoptotic genes expression (yellow) in *control* and *Arpc5* RNAi conditions. **c-d**, Dot  
436 plots showing the angle of the stripes of expression of *Deadpan* (**c**) or *reaper* (**d**) in the folds relative to the  
437 proximal-distal axis in *control* (*rpr-lacZ; Dll-Gal4*) and *Arpc5* RNAi (*rpr-lacZ; Dll-Gal4; UAS-Arpc5RNAi*) leg discs  
438 (n=13 and 11 respectively). A *F*-test of equality of variances was used. ns, not significant. Black lines represent  
439 the mean  $\pm$  SD. **e-f**, 3D-reconstructions of *control* (**e**) and *Arpc5* RNAi (**f**) leg discs showing the expression of  
440 *Deadpan* (magenta, arrows). Yellow and blue domain respectively highlight the predicted and the real fold.  
441 Asterisks point out *Dpn*-expressing neurons. **g**, Average number of dying cells inside or outside the predicted  
442 distal-most tarsal fold in *control* and *Arpc5* RNAi leg discs (n=20 and 28, respectively). Bar graphs indicate the  
443 mean  $\pm$  SEM. Cartoons on the left recapitulate the regions inside (yellow) and outside (brown) of the predicted  
444 fold. **h,i**, Sagittal views showing apoptotic myosin cables (**h**) and dot plots showing the initial velocity of  
445 apoptotic cable recoil after laser microdissection (**i**) in *control* (*sqh-GFP[29B]; Dll-Gal4*) and *Arpc5* RNAi (*sqh-*  
446 *GFP[29B]; Dll-Gal4; UAS-Arpc5RNAi*) leg discs (n=6 and 10, respectively). Black line indicates the median. In **g**  
447 and **i**, the statistical significance was calculated using Mann-Whitney U test. ns, not significant. Scale bars are  
448 20  $\mu$ m in **a, b, e** and **f**; 2  $\mu$ m in **h**.

449 **Figure 3: Leg morphogenesis occurs in a mechanically noisy environment (Related to FigS3, FigS4 and Movie**  
450 **S4).**

451 **a**, Fold morphology in *control* or *Arpc5* RNAi arm-GFP pupal leg discs and corresponding schemes. **b,d**, Confocal  
452 images showing the 'Notch border' (red arrowheads) (**b**) or the non-apoptotic apico-basal myosin structure  
453 (black arrowheads) (**d**) in *control* (*sqh-GFP[29B]; Dll-Gal4*) and *Arpc5* RNAi (*sqh-GFP[29B]; Dll-Gal4; UAS-*  
454 *Arpc5RNAi*) conditions. **c**, Dot plots of the initial recoil velocity observed after microdissection of adherens  
455 junctions at the 'Notch border' or adjacent junctions in *control* (*sqh-RFPt[3B]; Dll-Gal4; arm-GFP*) and *Arpc5*  
456 RNAi (*sqh-RFPt[3B]; Dll-Gal4; arm-GFP, UAS-Arpc5RNAi*) leg discs (n=11, 12, 10 and 12 respectively). **e**, Dot  
457 plots of the initial recoil velocity of non-apoptotic apico-basal myosin structure or lateral membrane after laser  
458 dissection in *control* (*sqh-GFP[29B]; Dll-Gal4*) and *Arpc5* RNAi (*sqh-GFP[29B]; Dll-Gal4; UAS-Arpc5RNAi*) leg discs  
459 (n=14, 12, 10 and 10 respectively). In **c, e** black lines indicate the median. Statistical significance has been  
460 calculated using Mann-Whitney U test. ns, not significant; \*, p-value < 0.05; \*\*, p-value < 0.01; \*\*\*, p-value <  
461 0.001. **f**, Rolled-out maps of the fold domain indicating the locations of mechanical perturbations observed in

462 close vicinity of the predicted fold (yellow) in *control* and *Arpc5* RNAi leg discs (n=14 and 14, same genotypes as  
463 d). **g**, *In silico* simulations at the maximal fold depth without (left) or with (right) mechanical perturbation  
464 (challenged cells are indicated in black). **h**, Rolled-out map of mechanical perturbations random locations (grey)  
465 from 25/55 *in silico* simulations. 3 perturbations were integrated for each simulation. **i**, Dot plots showing the  
466 maximal distance between the real fold and the predicted fold (highlighted in yellow) in *in silico* simulations  
467 without (left) or with (right) mechanical perturbations. **j**, Dot plots showing the angle of the fold relative to the  
468 proximal-distal axis in *in silico* simulations without or with mechanical perturbations. In **a**, **b**, **d**, **g**, predicted fold  
469 is highlighted in yellow, real fold in blue and perfect match between them in green. In **i** and **j**, a Levene's test  
470 was used. \*\*\*, p-value < 0.001. Scale bar represents 20  $\mu$ m in **a**, **b**, **d**.

471 **Figure 4: The leg epithelial tissue exhibits myosin planar polarity. (Related to FigS5)**

472 **a-d**, Close up views of confocal images showing the distribution of  $\beta$ -catenin-GFP and Myosin II (*sqh-RFPt[3B]*)  
473 in *control* and *Arpc5* RNAi leg discs at the onset of fold formation (**a,b**) or at mid-fold stage (**c,d**) in the fold  
474 domain (**a,c**) or in the adjacent domain (**b,d**); **a'-d'**, Quantification of the Myosin II distribution at junctions. **a''-**  
475 **d''**, Quantification of the cell shape anisotropy. In **a-d**, red and blue arrowheads indicate proximal-distal and  
476 circumferential junctions, respectively. In **a'-d'**, graph bars correspond to the mean  $\pm$  SEM. In **a''-d''** black lines  
477 indicate the median. Statistical significance has been calculated using Mann-Whitney U test. ns, not significant;  
478 \*\*\*, p-value < 0.001. n = 752 and n = 590 junctions in **a'**; n = 153 and n = 197 cells in **a''**; n = 603 and n = 645  
479 junctions in **b'**; n = 209 and n = 254 cells in **b''**; n = 1107 and n = 1223 junctions in **c'**; n = 301 and n = 364 cells in **c''**;  
480 n = 1087 and n = 980 junctions in **d'**; n = 381 and n = 384 cells in **d''**.

481

482 **Figure 5: Polarized Arp2/3 drives polarized F-actin distribution in the leg epithelial tissue (Related to FigS5)**

483 **a-b**, Confocal images (**a**) showing the distribution of actin in *control* (*Dll-Gal4; arm-GFP*) or *Arpc5* RNAi (*Dll-*  
484 *Gal4; arm-GFP, UAS-Arpc5RNAi*) leg discs in the fold domain and quantification (**b**) in both the fold domain  
485 (left; n = 1004 and n = 981 junctions respectively) and the adjacent domain (right; n = 823 and n = 672 junctions  
486 respectively). **c-d**, Confocal images (**c**) showing the distribution of Arp3 (*ap-Gal4, UAS  $\alpha$ -catenin-TagRFP, UAS*  
487 *Arp3-GFP*) and quantification (**d**) in the fold domain and in the adjacent domain (n = 582 and n = 432 junctions  
488 respectively).

489 **Figure 6: Planar polarity is required for morphogenetic robustness (Related to FigS6 and FigS7).**

490 **a**, Confocal images showing the distribution of E-cadherin,  $\alpha$ -catenin and Myosin II in *control* (*sqh-GFP[29B];*  
491 *tubG80ts; ap-Gal4, UAS  $\alpha$ -catenin-TagRFP*) or *AJs GFP-trap* (*sqh-GFP[29B]; tubG80ts; ap-Gal4, UAS vhhGFP4- $\alpha$ -*  
492 *catenin-TagRFP*) leg discs. **b**, Quantification of Myosin II distribution at junctions in leg discs in both conditions  
493 (n = 1009 and n = 564 junctions respectively). **c**, Confocal images showing fold morphology in *control* or *AJs GFP-*  
494 *trap* leg discs (deviated fold represents 0/15 and 8/12, respectively). Predicted fold domain is highlighted in  
495 yellow, real fold in blue and perfect match between them in green. Scale bar represents 20  $\mu$ m. **d**, Dot plots  
496 showing the relative maximal distance between the real fold and the predicted fold (highlighted in yellow) in  
497 *control* or *AJs GFP-trap* leg discs (n=15 and 12 legs, respectively). **e**, Dot plots showing the angle of T3-T4 and  
498 T4-T5 folds relative to the proximal-distal axis in *control* or *AJs GFP-trap* leg discs (n=15 and 12 legs,  
499 respectively). **f**, Dot plots showing the fold parallelism in *control* or *AJs GFP-trap* leg discs (n=15 and 12 legs,  
500 respectively). In **d-f**, A F-test of equality of variances has been used to compare the phenotypic variances. \*\*\*,  
501 p-value < 0.001. **g**, *In silico* simulations including mechanical perturbations (challenging cells are shown in  
502 black) for different values of junction weight ratio (i.e. tension anisotropy). Predicted fold domain is highlighted  
503 in yellow, real fold in blue and perfect match between them in green. **h**, Dot plots showing the maximal  
504 distance between the real fold and the predicted fold (highlighted in yellow) for different values of junction  
505 weight ratio (polarity). (n = 55 simulations in each cases). **i**, Dot plots showing the angle of the fold relative to  
506 the proximal-distal axis for different values of junction weight ratio (polarity). (n = 55 simulations in each cases).

507 In **h** and **i**, a Levene's test has been used to compare the variance of phenotypes. \*, p-value < 0.05; \*\*, p-value  
508 < 0.01.

509 **Figure 7. Planar polarity favors force channeling.**

510 **a**, Schematics showing the impact of the wound (left), the forces in presence (F), and the maximum  
511 displacement of vertices at various cell diameters (d). **b,d**, Z-projections of *control* (*Dll-Gal4; arm-GFP*) and  
512 *Arpc5* RNAi (*Dll-Gal4; arm-GFP, UAS-Arpc5RNAi*) leg discs before (left) and after (middle) the cut. Overlay are  
513 shown on the right. Red circles indicate site of ablation. Scale bar represents 2  $\mu\text{m}$ . **c,e**, Average displacement  
514 of vertices (represented by vectors) at different distances and angles from the cut site (center) in *control* (**b**)  
515 and *Arpc5* RNAi (**c**) (n= 8, 10 legs respectively). Distance from the cut is color coded as in **a**. **f**, Schematics  
516 indicating the absence (top) or the presence (bottom) of wound and the forces in presence at the level of the  
517 circular cut (left) and the external and internal maximal recoils after circular ablation (right). In the absence of  
518 wound (top) the internal release  $d^*$  depends on the residual stress present in the circular isolated tissue  
519 fragment, while the external release  $d$  depends on the tension present in the rest of the tissue. In the presence  
520 of wound-healing traction force (bottom), the internal release  $dw^*$  depends on both the residual stress present  
521 in the circular tissue fragment ( $F_{int}$ ) plus the wound-healing traction force ( $F_w$ ), while the external release  $dw$   
522 depends on both residual stress in the whole tissue plus the force transmitted in response to the wound-  
523 healing traction force ( $F_{wtr}$ ). **g**, Confocal images of the *control* and *Arpc5* RNAi leg discs (same genotypes as in  
524 **b**). External and internal maximal recoils of the tissue are indicated by the green and purple lines respectively,  
525 while the initial positioning of the circular ablation is indicated by a dashed red line. Scale bar represents 5  $\mu\text{m}$ .  
526 **h-i**, Quantifications of internal (**h**) and external (**i**) maximal recoils of the tissue in the absence (light grey and  
527 light blue) or the presence (dark grey and dark blue) of wound in *control* and *Arpc5* RNAi leg discs (n= 10, 10,  
528 12, 10 respectively). Statistical significance has been calculated using Mann-Whitney U test. ns, not significant;  
529 \*, p-value < 0.05; \*\*, p-value < 0.01; \*\*\* p-value < 0.001. Graph bars correspond to the mean  $\pm$  SEM.

530

531

532 **Star Method**

533 **Key Resources Table**

| REAGENT or RESOURCE                                  | SOURCE                                        | IDENTIFIER                    |
|------------------------------------------------------|-----------------------------------------------|-------------------------------|
| <b>Antibodies</b>                                    |                                               |                               |
| Rat anti-deadpan antibody (1:100)                    | Abcam                                         | Cat#ab195172                  |
| Rabbit anti-cleaved dcp1 (1:200)                     | Cell Signaling Technology                     | Cat#9578; RRID: AB_2721060    |
| Rat anti-E-cadherin(1:50)                            | DSHB                                          | DCAD2; RRID: AB_528120        |
| chicken $\beta$ -galactosidase (1:1000)              | GeneTex                                       | Cat# GTX77365, RRID:AB_379834 |
| Goat anti-rat IgG 647                                | Thermo Fisher Scientific                      | Cat# A-21247,RRID:AB_141778   |
| Goat anti-rat IgG 555                                | Thermo Fisher Scientific                      | Cat# A-21434 RRID:AB_2535855  |
| Goat anti-rabbit IgG 555                             | Thermo Fisher Scientific                      | Cat# A-21428 RRID:AB_2535849  |
| Goat anti-chicken IgG 488                            | Thermo Fisher Scientific                      | Cat# A-11039, RRID:AB_2534096 |
| <b>Bacterial and Virus Strains</b>                   |                                               |                               |
|                                                      |                                               |                               |
| <b>Chemicals, Peptides, and Recombinant Proteins</b> |                                               |                               |
| Phalloidin-Rhodamine                                 | Thermo Fisher Scientific                      | Cat# R415 RRID:AB_2572408     |
| Phalloidin-Alexa488                                  | Thermo Fisher Scientific                      | Cat# A12379                   |
| Vectashield                                          | Vector Laboratories                           | Cat#H-1000                    |
| TRIzol Reagent                                       | ThermoFisher Scientific                       | Cat#15596026                  |
| 20-hydroxyecdysone                                   | Sigma-Aldrich                                 | Cat# H5142                    |
| <b>Critical Commercial Assays</b>                    |                                               |                               |
| Luna Script reverse transcriptase SuperMix kit       | NEB                                           | Cat#E3010S                    |
| Luna Universal qPCR Master Mix                       | NEB                                           | Cat#M3003S                    |
| <b>Experimental Models: Organisms/Strains</b>        |                                               |                               |
| <i>D. melanogaster</i> : w; Dll-Gal4[em212]          | Gift from G. Morata<br>M. Calleja et al, 1996 | FBti0007187                   |



|                                                                                                     |                                                      |                                                            |
|-----------------------------------------------------------------------------------------------------|------------------------------------------------------|------------------------------------------------------------|
| <i>D. melanogaster</i> : ap-Gal4: y[1]w[1118]; P{w[+mW.hs]=GawB}ap[md544]/CyO                       | BDSC                                                 | RRID: BDSC_3041                                            |
| <i>D. melanogaster</i> : hh-Gal4; UAS-GFP                                                           | Gift from C. Benassayag                              | Centre de Biologie Intégrative (CBI), LBCMCP               |
| <i>D. melanogaster</i> : rpr-4kb-lacZ                                                               | Gift from Gines Morata (stock referenced in Flybase) | Centro de Biología Molecular Severo Ochoa (CBM SO), Madrid |
| <i>D. melanogaster</i> : w; ; ap <sup>42B11</sup> -Gal4                                             | Gift from C. Estella                                 | Centro de Biología Molecular Severo Ochoa (CBM SO), Madrid |
| <i>D. melanogaster</i> : tubG8ots: w[*]; P{w[+mC]=tubP-GAL80[ts]}20; TM2/TM6B, Tb[1]                | BDSC                                                 | RRID: BDSC_7019                                            |
| <i>D. melanogaster</i> : arm-GFP: w[*]; P{w[+mW.hs]=arm-GFP.P}57                                    | BDSC                                                 | RRID: BDSC_8556                                            |
| <i>D. melanogaster</i> : Arp3-GFP: w[*]; P{w[+mC]=UASp-Arp3.GFP}2                                   | BDSC                                                 | RRID: BDSC_39723                                           |
| <i>D. melanogaster</i> : Myosin-GFP: w, sqh{TI}-eGFP [29B]                                          | Ambrosini et al, 2019                                | Centre de Biologie Intégrative (CBI), LBCMCP               |
| <i>D. melanogaster</i> : Myosin-RFP: w, sqh{TI}-TagRFP [3B]                                         | Ambrosini et al, 2019                                | Centre de Biologie Intégrative (CBI), LBCMCP               |
| <i>D. melanogaster</i> : ECad-GFP: w ; shg{TI}-eGFP                                                 | BDSC                                                 | RRID:BDSC_60584                                            |
| <i>D. melanogaster</i> : w; UAS-alpha-Catenin-TagRFP                                                | Gift from K. Sugimura<br>Ishihara and Sugimura, 2012 | FBalo279996<br>Kyoto University, iCeMS                     |
| <i>D. melanogaster</i> : cytoplasmic GFP apoptosensor: w; UAS-GC3Ai [G16]                           | Schott et al, 2017                                   | Centre de Biologie Intégrative (CBI), LBCMCP               |
| <i>D. melanogaster</i> : AJ GFP-trap: w; UAS <sup>t</sup> -vhhGFP4-alpha-Catenin-TagRFP             | This study                                           | N/A                                                        |
| <i>D. melanogaster</i> : RNAi of Arpc3A: y[1] v[1]; P{y[+t7.7] v[+t1.8]=TRiP.JFo2370}attP2          | BDSC                                                 | RRID:BDSC_27044                                            |
| <i>D. melanogaster</i> : RNAi of Arpc5: y[1] v[1]; P{y[+t7.7] v[+t1.8]=TRiP.JFo3147}attP2           | BDSC                                                 | RRID:BDSC_28720                                            |
| <i>D. melanogaster</i> : RNAi of Arp2: y[1] v[1]; P{y[+t7.7] v[+t1.8]=TRiP.JFo2785}attP2/TM3, Sb[1] | BDSC                                                 | RRID:BDSC_27705                                            |
| <i>D. melanogaster</i> : LacZ: w[*]; P{w[+mC]=UAS-lacZ.Exel}2                                       | BDSC                                                 | RRID:BDSC_8529                                             |
| Oligonucleotides                                                                                    |                                                      |                                                            |

|                                                                                                                 |                                                                                   |                            |
|-----------------------------------------------------------------------------------------------------------------|-----------------------------------------------------------------------------------|----------------------------|
| Primer vhhGFP4-F_InF:<br>GGCCGCGGCTCGAGGATGGTCCAACCTGGTGGAGTCTG                                                 | This study                                                                        | N/A                        |
| Primer vhhGFP4-R+linker:<br>AAAGATCCTCTAGAGGTACCATGAACTCGCCGCTGCC<br>GGCGGCGCTGCCGGCGCTGCCGCTGGAGACGGTGAC<br>CT | This study                                                                        | N/A                        |
| Primer a-catTagRFP-F_InF#2:<br>AGCGGCGAGTTCATgTTAAAAACCTGATAAAATGGGCA<br>CG                                     | This study                                                                        | N/A                        |
| Primer a-catTagRFP-R_InFusion:<br>AAAGATCCTCTAGAGTCAATTAAGTTTGTGCCCCAGT                                         | This study                                                                        | N/A                        |
| Arpc5_FW: GAGGATGATGGGGTGGAGAG                                                                                  | This study                                                                        | N/A                        |
| Arpc5_REV: GTCCATTTGCGTCTGACTTGA                                                                                | This study                                                                        | N/A                        |
| RP49_FW: GACGCTTCAAGGGACAGTATCTG                                                                                | This study                                                                        | N/A                        |
| RP49_REV: AAACGCGGTTCTGCATGAG                                                                                   | This study                                                                        | N/A                        |
| GAPDH_FW: CGTTCATGCCACCACCGCTA                                                                                  | This study                                                                        | N/A                        |
| GAPDH_REV: CCACGTCCATCAGCCACAA                                                                                  | This study                                                                        | N/A                        |
| Recombinant DNA                                                                                                 |                                                                                   |                            |
| pUAS-Dacatenin-TagRFP plasmid                                                                                   | Gift from K. Sugimura<br>Ishihara and<br>Sugimura, 2012                           | Kyoto University,<br>iCeMS |
| nanoGFP-cry2 plasmid                                                                                            | Gift from R. Le Borgne                                                            | IGDR, Rennes               |
| pUAS-attB                                                                                                       | DGRC                                                                              | Cat#1419                   |
| Software and Algorithms                                                                                         |                                                                                   |                            |
| GraphPad Prism 8                                                                                                | GraphPad Software                                                                 | RRID: SCR_002798           |
| Adobe Illustrator CS5                                                                                           | Adobe                                                                             | RRID:SCR_010279            |
| Imaris 8.4.1                                                                                                    | Bitplane                                                                          | RRID: SCR_007370           |
| Fiji                                                                                                            | <a href="https://fiji.sc/">https://fiji.sc/</a>                                   | RRID: SCR_002285           |
| ZEN Blue                                                                                                        | ZEISS                                                                             | RRID:SCR_013672            |
| Black Zen software                                                                                              | ZEISS                                                                             | RRID:SCR_018163            |
| ROE Syscon                                                                                                      | Rapp OptoElectronic                                                               | N/A                        |
| CFX Manager 3.1                                                                                                 | Bio-Rad                                                                           | RRID:SCR_017251            |
| Python 3.7                                                                                                      | <a href="http://www.python.org/">http://www.python.org/</a>                       | RRID:SCR_008394            |
| MatPlotLib                                                                                                      | <a href="http://matplotlib.sourceforge.net">http://matplotlib.sourceforge.net</a> | RRID:SCR_008624            |

|                            |                                                                                                       |               |
|----------------------------|-------------------------------------------------------------------------------------------------------|---------------|
| Vertex model tissue v0.7.1 | <a href="https://zenodo.org/badge/latestdoi/32533164">https://zenodo.org/badge/latestdoi/32533164</a> | N/A           |
| OpenPIV v0.23.1            | <a href="https://doi.org/10.5281/zenodo.3930343">https://doi.org/10.5281/zenodo.3930343</a>           | N/A           |
| Other                      |                                                                                                       |               |
| Schneider's insect medium  | Sigma-Aldrich                                                                                         | Cat#S0146     |
| Halocarbon oil             | Sigma-Aldrich                                                                                         | Cat#H8773     |
| 120 µm deep Secure-Seal™   | Sigma-Aldrich                                                                                         | Cat#GBL654008 |

534

### 535 [Contact for Reagent and Resource Sharing](#)

536 Further information and requests for resources and reagents should be directed to and will be  
537 fulfilled by the Lead Contact, Magali Suzanne ([magali.suzanne@univ-tlse3.fr](mailto:magali.suzanne@univ-tlse3.fr)).

538

### 539 [Experimental model and subject details](#)

#### 540 [Experimental Animals](#)

541 The animal model used here is *Drosophila melanogaster*, in a context of in vivo/ex vivo  
542 experiments. In order to respect ethic principles, animals were anesthetized with CO<sub>2</sub> (adults)  
543 before any manipulation. To avoid any release of flies outside the laboratory, dead flies were  
544 frozen before throwing them. Stocks of living flies were conserved in incubators, either at 18  
545 or 25 degrees to maintain the flies in optimal condition. Genotypes and developmental stages  
546 are indicated below. Experiments were performed in both males and females indifferently.  
547 Loss of function experiments using RNAi were carried out at 30 degrees.

#### 548 [Drosophila melanogaster](#)

549  $ap^{md544}$ -Gal4, arm-arm-GFP, tubG80ts, UAS-Arp3-GFP and E-Cad-GFP knock-in were  
550 obtained from Bloomington Drosophila Stock Center (BDSC). sqh-eGFP<sup>KI</sup>[29B], sqh-  
551 RFP<sup>KI</sup>[3B] and the GFP aptosensor UAS-GC3Ai were described previously (Ambrosini et  
552 al., 2019; Schott et al., 2017). hh-Gal4; UAS-GFP is a gift from C. Benassayag. DII<sup>EM212</sup>-Gal4  
553 and rpr-4kb-lacZ are gifts from G. Morata.  $ap^{42B11}$ -Gal4 and UAS- $\alpha$ -catenin-TagRFP are  
554 gifts from C. Estella and K. Sugimura.

555 RNAi experiments were realized using UAS-Arpc3A-RNAi (JF02370), UAS-Arpc5-RNAi  
556 (JF03147), UAS-Arp2 RNAi (JF02785), UAS-lacZ, obtained from BDSC.

557

## 558 [Method details](#)

### 559 [AJ GFP-trap construct](#)

560 To trap Myosin-GFP at junctions, we constructed a *pUAS<sup>t</sup>-vhhGFP4- $\alpha$ -catenin-TagRFP* (AJs  
561 GFP-trap). To do so,  *$\alpha$ -catenin-TagRFP* was amplified by PCR with specific primers from a  
562 *pUAS-D $\alpha$ catenin-TagRFP* (kindly provided by Dr K. Sugimura). *vhhGFP4* was amplified by  
563 PCR from *nanoGFP-cry2* plasmid (gift from Dr Le Borgne). A 36nt sequence was added in  
564 the reverse primer to create a GSAGSAAGSGEF linker between the GFP-trap sequence and  
565  *$\alpha$ -catenin-TagRFP* sequence. These two fragments were successively cloned using InFusion  
566 technology in *pUAS<sup>t</sup>-attB* plasmid cut with KpnI.

567 The resulting *pUAS<sup>t</sup>-vhhGFP4- $\alpha$ -catenin-TagRFP* plasmid injection was performed by the  
568 CBMSO Drosophila Transgenesis Service (Madrid, Spain) using flies carrying attP2 landing  
569 sites on the third chromosome to produce transgenic flies.

### 570 [RNA and RT-qPCR analyses](#)

571 RNAi efficiency was assessed by mRNA phenol/chloroform extraction and reverse  
572 transcription was done using the Luna Script reverse transcriptase SuperMix kit (NEB –  
573 E3010S). cDNAs were quantified by qPCR using the Luna Universal qPCR Master Mix  
574 (NEB – M3003S) (primer sequences: *Arpc5\_FW* GAGGATGATGGGGTGGAGAG and  
575 *Arpc5\_REV* GTCCATTTGCGTCGACTTGA) and normalized against *RP49* and *GAPDH*  
576 cDNA levels (primer sequences: *RP49\_FW* GACGCTTCAAGGGACAGTATCTG ;  
577 *RP49\_REV* AAACGCGGTTCTGCATGAG and *GAPDH\_FW*  
578 *CGTTCATGCCACCACCGCTA* ; *GAPDH\_REV* CCACGTCCATCACGCCACAA). The  
579 relative normalized cDNA expression levels were calculated using the DeltaDeltaCt method  
580 from Bio-Rad CFX Manager 3.1 software.

### 581 [Immunofluorescence](#)

582 Imaginal leg discs were dissected after 48h at 29°C at prepupal stage (0, 1.5 or 2.5 hours after  
583 pupae formation – APF) in PBS 1X. Imaginal discs were fixed 20' in paraformaldehyde 4%  
584 diluted in PBS 1X, then washed in PBS 1X and either mounted in Vectashield (Vectors  
585 laboratories) or extensively washed in PBS-Triton 0.3%-BSA 1% (BBT) and incubated  
586 overnight at 4°C with appropriate dilutions of primary antibodies in BBT. Rat anti-deadpan  
587 antibody (Abcam – ab195172) was used at 1:100 dilution, rabbit anti-dcp1 (Cell Signaling  
588 Technology – 9578S) at 1:200, rat anti-E-cadherin antibody (Developmental Studies

589 Hybridoma Bank – DCAD2) at 1:50 and chicken  $\beta$ -galactosidase (GeneTex – GTX77365) at  
590 1:1000. After washes in BBT, imaginal leg discs were incubated at room temperature for 2 h  
591 with 1:200 anti-rat IgG 647, anti-rat IgG 555, anti-rabbit IgG 555 or anti-chicken IgG 488  
592 (obtained from Interchim) with or without phalloidin (Alexa488 at 1:500 or rhodamin at  
593 1:500 – Fisher Scientific). Then, samples were washed in PBS-Triton 0.3%, suspended in  
594 Vectashield (Vectors laboratories) and mounted on slides.

#### 595 [Ex vivo culture of leg imaginal disc](#)

596 Imaginal leg discs were dissected from prepupal stage (1.5 hours APF at 29°C) in Schneider's  
597 insect medium (Sigma-Aldrich) supplemented with 15 % fetal calf serum and 0.5 %  
598 penicillin-streptomycin as well as 20-hydroxyecdysone at 2  $\mu$ g/mL (Sigma-Aldrich, H5142).  
599 Leg discs were transferred on a slide in 12  $\mu$ L of this medium in a well formed by a 120  $\mu$ m-  
600 deep double-sided adhesive spacer (Secure-Seal™ from Sigma-Aldrich). A coverslip was  
601 then placed on top of the spacer. Halocarbon oil was added on the sides of the spacer to  
602 prevent dehydration.

#### 603 [Confocal imaging](#)

604 Samples were analyzed using a LSM880 confocal microscope fitted with a Fast Airyscan  
605 module (Carl Zeiss) and equipped with a Plan-Apochromat 40x/NA 1.3 Oil DIC UV-IR M27  
606 objective. Z-stacks were acquired using either the laser scanning confocal mode or the High  
607 Resolution mode (Airyscan) with a pixel size of 0.046  $\mu$ m/pixel and a z-step of 0.220  $\mu$ m.  
608 Airyscan Z-stacks were processed in ZEN software using the automatic strength (6 by  
609 default) and the 3D method.

#### 610 [Laser ablation](#)

611 Laser ablation experiments were performed using a pulsed DPSS laser (532 nm, pulse length  
612 1.5 ns, repetition rate up to 1 kHz, 3.5  $\mu$ J/pulse) steered by a galvanometer-based laser  
613 scanning device (DPSS-532 and UGA-42, from Rapp OptoElectronic, Hamburg, Germany)  
614 and mounted on a LSM880 confocal microscope (Carl Zeiss) equipped with a 63x C-  
615 Apochromat NA 1.2 Water Corr objective (Carl Zeiss). Photo-ablation of apical junction was  
616 done in the focal plane by illuminating at 70 % laser power during 1 s. This focal plane was  
617 acquired every 0.551 s, during 10 s before and at least 45 s after ablation, with a pixel size of  
618 0.13  $\mu$ m/pixel. Photo-ablation of apico-basal Myosin II enrichment was done in the focal  
619 plane by illuminating at 100 % laser power during 2-2.5 s along a 45-50 pixels line. This focal  
620 plane was acquired every 0.551 s, during 5 s before and at least 45 s after ablation, with a

621 pixel size of 0.13  $\mu\text{m}/\text{pixel}$ . Data analysis was performed with the ImageJ software using a  
622 homemade macro.

623 For experiments on tissue scale tension anisotropy (Fig7a-e), a Z-stack of 7 slices was  
624 acquired every 1.774s during 10s before and 3 minutes after ablation, with a pixel size of 0.13  
625  $\mu\text{m}/\text{pixel}$ . Photo-ablation of a vertex was done during the stack acquisition by illuminating at  
626 75 % laser power during 2 s in a 6 pixels radius circle. Data analysis was performed with the  
627 ImageJ software by measuring the displacement (distance and orientation) reached at the  
628 maximal recoil of all vertices in a 10  $\mu\text{m}$  radius circle around the ablated vertex, from their  
629 initial location (before cut), using Manual tracking plugin.

630 For circular photo-ablation, the focal plane was illuminated during 4-5 s along a 45 pixels  
631 radius circle (Fig7f-i). This focal plane was acquired every 0.551 s, during 10 s before and at  
632 least 45 s after ablation, with a pixel size of 0.13  $\mu\text{m}/\text{pixel}$ . For the second set of experiments  
633 (wound healing), tissue was first wounded at the level of a tricellular junction by illuminating  
634 during 4-5 s along a 10 pixels radius circle and then cut circularly during the healing phase  
635 using the circular shape described above (Fig7f-i). Data analysis was performed with the  
636 ImageJ software. Briefly, the distance between the location of the circular cut and the  
637 maximal recoil induced by this ablation was measured at  $0^\circ$  (proximal-distal axis) and  $90^\circ$   
638 (circular axis) using the line tool.

## 639 **The Vertex Model**

### 640 **Initial tissue generation**

641 We modeled the most distal part of the leg imaginal disc (Fig1a), before the T4-T5 fold  
642 formation begins, as a 2D meshwork around a cylinder capped by two hemispheres, oriented  
643 along the proximal-distal axis. We started with a mostly hexagonal lattice with a perimeter of  
644 23 cells and a length of 15 cells. We perform two rounds of cell divisions with a random  
645 division axis to randomize cell side number and create a meshwork of approximately 50 by 30  
646 cells. Diversity of cell shapes is increased by adding variability to the cells' preferred areas,  
647 normally distributed with an 8% variance. The initial tissue has 1652 cells, is 200  $\mu\text{m}$  long in  
648 its proximal-distal axis and 100  $\mu\text{m}$  in diameter.

### 649 **Mechanical model**

650 The epithelium shape is given by the quasi-static equilibrium of a potential energy dependent  
651 on the junctional mesh geometry, following our previous work (Gracia et al., 2019; Monier et  
652 al., 2015).

653 This energy is given in equation (1) and is comprised of three cell-level terms and two  
 654 constrain terms. At the cell level, apical shape is governed by area and perimeter elasticity  
 655 terms, following (Bi et al., 2015). To these terms, we add a linear apico-basal tension for the  
 656 apoptotic cells, dependent on cell height. Two more terms ensure maintenance of the overall  
 657 tissue shape. First, the total volume of the tissue is maintained by an elastic constrain. Second,  
 658 an external barrier is modeled as a sphere surrounding the tissue; when the distance of a  
 659 vertex from the sphere center is higher than the sphere radius, it is pulled back to this radius  
 660 by an elastic force.

661

$$E = \sum_{\alpha} \left( \frac{K_{\alpha}}{2} (A_{\alpha} - A_{\alpha,0})^2 + \frac{K_p}{2} (P - P_{\alpha,0})^2 + T_{\alpha}^{ab} h_{\alpha} \right) + \frac{K_V}{2} (V - V_0)^2 + \sum_i \frac{K_b}{2} \delta^+ R_i^2 \quad (1)$$

662 The value of (KV) was chosen at the lowest value such that compression of the tissue by  
 663 cellular contractility and the effect of the lumen on the fold formation was minimal and kept  
 664 the tissue integrity (see FigS6). Here  $\sum_{\alpha}$  marks the sum over every polygonal cell and  $\sum_i$   
 665 a sum over every vertex. Apico-basal tension is exerted from the vertices towards the  
 666 proximal-distal axis (center of the cylinder). We consider an anchor point  $i'$  as the protection  
 667 of the vertex  $i$  onto the proximal-distal axis.  $i'$  is rigidly fixed to this axis. The penetration  
 668 depth  $\delta^+ R_i$  is defined by:

$$\delta^+ R_i = \begin{cases} R_i - R_p & \text{if } R_i > R_b \\ 0 & \text{if } R_i \leq R_b \end{cases} \quad (2)$$

669 Energy minimum is reached through a gradient descent strategy using the Broyden-Fletcher-  
 670 Goldfarb-Shanno bound constrained minimization algorithm from the scipy library (van der  
 671 Walt et al., 2011).

## 672 Tissue anisotropy

673 In vivo, cell polarity translates in different mechanical properties for different cell junctions.  
 674 Here, in order to create the cell anisotropy (the ratio between the long axis and the  
 675 perpendicular axis of the apical surface of the cell), we added a weight on each cell junction  
 676 in the calculation of cell perimeter. The modified perimeter is calculated as the weighted sum

$$P^* = \frac{\sum_{ij \in \alpha} \omega_{ij} l_{ij}}{\sum_{ij \in \alpha} \omega_{ij}} n_{\alpha} \quad (3)$$

677 Where  $\sum_{ij \in \alpha}$  denotes a sum over all edges of cell  $\alpha$  and  $\omega_{ij}$  is the weight of the junction  $ij$ ,  
678  $l_{ij}$  is the length of the junction  $ij$  and  $n_\alpha$  is the number of sides of cell  $\alpha$ . Note that this  
679 weighted sum is equal to the actual perimeter when all weights are equals, and allows to  
680 model polarity without any modification of the other dynamical parameters.

681 We set two different values of the weight depending on the orientation of the edge. Weight is  
682 higher for circumferential edges ( $\omega_{//}$ ) than for proximal-distal ones ( $\omega_{\perp}$ ). (FigS7c-h). As cell  
683 shapes are on average hexagonal, we set the boundary between parallel and perpendicular  
684 junctions at  $\pi/3$ .

### 685 Apoptotic process

686 Around 30 apoptotic cells are chosen randomly in the fold region according to a probability  
687 density described in our previous work (Monier et al., 2015). The tissue deforms  
688 progressively as apoptotic cells undergo apical constriction and apico-basal traction through  
689 gradual changes in their mechanical parameters, while other cells passively follow the  
690 deformation.

691 A cell starts apoptosis at time step  $t_i$  such that  $t_i = t_f \frac{\phi_\alpha}{\pi}$  where  $\phi_\alpha$  is the angle of the cell's  
692 apical surface face center with respect to the dorso-ventral axis and  $t_f$  the final simulation  
693 time.

694 Apoptosis is modeled as a sequence of apical constriction and apico-basal traction.

695 Apical constriction consists in a reduction of the cell's preferred perimeter  $P_{\alpha,0}$  at a constant  
696 rate  $\sqrt{\tau_\alpha}$  and a reduction of its preferred area  $A_{\alpha,0}$  at constant rate  $\tau_\alpha$  until the cell area  
697 reaches a threshold  $A_c$  as given in equation (4). Once the critical area is reached, preferred  
698 area and preferred perimeters are maintained constant.

699

$$\begin{cases} P_{\alpha,0}(t) = \frac{P_{(\alpha,0)}(t-1)}{\sqrt{\tau_\alpha}} \\ A_{\alpha,0}(t) = \frac{A_{(\alpha,0)}(t-1)}{\tau_\alpha} \end{cases} \quad \text{if } A_{\alpha,t} > A_c \quad (4)$$

700 During the apical constriction phase, contraction is propagated to neighboring cells.  
701 Contraction rate  $\tau_\beta$  of a neighboring cell  $\beta$  decreases linearly as the cell is farther away from  
702 the apoptotic cell:



$$\tau_{\beta} = \tau_{\alpha} - \frac{r}{r_{\max}} (\tau_{\alpha} - \tau_{\min}) \quad (5)$$

703

704 Here  $r = 1$  if the cell  $\beta$  is a direct neighbour of the apoptotic cell, 2 if it's a second order  
705 neighbor, and so on.  $r_{\max}$  is the span of the propagation and  $\tau_{\min}$  the contraction rate for cells  
706 at  $r_{\max}$  from the apoptotic cell.

707 Each apoptotic cell can develop an apico-basal tension, during and after the constriction  
708 phase, with probability  $p = \exp(-A_{\alpha}/A_c)$ . Traction takes place for  $N_t$  time steps, during  
709 which the apico-basal tension exerted on the face is  $T^{ab}$

#### 710 Mechanical perturbation

711 We modeled mechanical perturbations during fold formation as three “disrupting cells”  
712 placed randomly at a maximal distance of 40  $\mu\text{m}$  (7 cells distance) from the middle of the  
713 predicted fold position. The “disrupting cell” dynamics is similar to apoptosis, with apical  
714 constriction and apical-basal tension, however, apical constriction starts at the beginning of  
715 the simulation, and when the critical area is reached, apico-basal traction is applied until the  
716 end of the simulation. For every simulation, apart from the time span for which the  
717 mechanical perturbation is exerted, the parameters for the perturbing cell are identical to the  
718 parameters for an apoptotic cell.

#### 719 Choice of parameter values.

720 The unit energy (denoted by  $u$ ) is defined so that the area elasticity modulus  $K_{\alpha}$  equals  
721  $1 u/\mu\text{m}^4$ . To model lumen incompressibility, lumen volume elasticity  $K_V$  is such that apical  
722 contraction compresses the super-ellipsoid by 5% in volume ( $K_V = 1.10^{-5} u/\mu\text{m}^6$  (FigS4)).  
723 Preferred area  $A_0$  and preferred perimeter  $P_0$  are chosen to have a constant  $P_0/\sqrt{A_0}$  ratio of 2  
724 throughout the simulation, this corresponds to a stiff tissue in (Bi et al., 2015) framework.  
725 With the above value of  $P_0/\sqrt{A_0}$ , we choose the apical perimeter elasticity  $K_p$  to allow cell  
726 shape changes upon apical constriction.

727 The code used for modelling is publicly available: <https://github.com/DamCB/tyssue> and  
728 <https://github.com/suzannelab/polarity>.

#### 729 Quantification and statistical analysis

#### 730 Quantitative analysis of the fold variability

731 We characterized the variability of fold formation *in vivo* by measuring the maximal distance  
732 between the real fold from the predicted fold, the angle of the fold relative to the proximal-  
733 distal axis and the parallelism between folds, for *control* and *Arpc5 RNAi* expressing leg discs  
734 (genotypes are indicated in each figure legends), as follow:

735 - The maximal distance between real fold and predicted fold was measured in two steps. First,  
736 we measured the distance between the Notch signaling (labeled by Deadpan immunostaining)  
737 and the position of maximal deviation of the fold using the straight-line tool in ImageJ.  
738 Second, we calculated the mean of maximal distance in the control and subtracted the value  
739 obtained to each measure to normalize them independently from the genotype. Standard  
740 deviation of control legs was measured and used to define predicted fold ( $\pm 1.30 \mu\text{m}$  from the  
741 mean), which is highlighted in yellow on the graph in Figure 1c. Because the width of the  
742 *apterous* domain is more variable in AJs GFP-trap experiments, in Figure 6d we measured the  
743 relative maximal distance rather than the absolute maximal distance, by dividing the distance  
744 between the T3-T4 and the T4-T5 fold by the width of the *apterous* domain.

745 - The angle formed between the fold and the proximal-distal axis, was measured in ImageJ  
746 using the angle tool.

747 - The fold parallelism was calculated as the ratio between angles of two folds of the same leg.

#### 748 [Quantitative analysis of Dpn and Rpr expression domain](#)

749 Dpn and Rpr stripes of expression have been characterized using Image J software. The  
750 stripes have been outlined to define ROIs. From each ROI, the main axis (or ferret) has been  
751 defined and the orientation of this axis relative to the proximo-distal axis defined. Then, the  
752 voronoi (corresponding to the points equidistant from the proximal and distal border of the  
753 domain) was obtained to determine the mean width of the domain and the curvature.

#### 754 [Cartography of mechanical perturbations \*in vivo\*](#)

755 Zones of high apico-basal tension, or “mechanical perturbations”, were spotted on 3D  
756 reconstructions of (*sqh-GFP[29B]; Dll-Gal4*) and (*sqh-GFP[29B]; Dll-Gal4; UAS-*  
757 *Arpc5RNAi*) leg discs using Imaris and located on corresponding positions on rolled-out maps  
758 of the fold regions (Fig3f). To each perturbation corresponds a set of coordinates defined (in  
759 x) by the angle formed between the line going from the center of the leg to the perturbation  
760 and the DV axis and (in y) by the distance between the perturbation and the predicted fold.

## 761 Analysis of Junctional Intensities

762 Using the surface tool on Imaris (Bitplane), a mask was created from the junctional labelling  
763 (arm-GFP,  $\alpha$ -catenin-RFP or E-cadherin antibody) to quantify Myosin II, F-actin, adherens  
764 junctions or Arp3 present at junctions. From this new Z-stack, the maximum of intensity  
765 (MaxProj) and the sum of intensity (SumProj) were projected using Fiji (ImageJ 1.51s –  
766 NIH). Then, from the MaxProj, a skeleton was created and each junction was individualized  
767 by suppressing nodes. This template was used to identify each junction as a region of interest  
768 (ROI). From these ROIs, the angle – formed with the proximal-distal axis – and the raw  
769 fluorescence intensity of each junction were measured on the SumProj (allowing to sum the  
770 full quantity of Myosin II present at a given xy position). Manual correction was done if  
771 required.

772 The junctional mean of fluorescence intensity  $\bar{I}_j$  along junction  $j$  was normalized to the  
773 average junction intensity over all the junctions analyzed (fold+adjacent domain)  $\frac{1}{n} \sum_{i=0}^n \bar{I}_i$ :

$$I_{Rj} = \frac{\bar{I}_j}{\frac{1}{n} \sum_{i=0}^n \bar{I}_i}$$

774

## 775 Analysis of the cell aspect ratio

776 Using Fiji software, the maximal intensity projection was done from a Z-stack and a skeleton  
777 was created. This template was used to identify each cell as a region of interest (ROI). From  
778 these ROIs, the aspect ratio (major axis / minor axis) was measured in order to define the  
779 anisotropy of the cell.

## 780 Quantitative analysis of the apical myosin

781 Using ImageJ software, a segmented line was drawn along the apical surface of the posterior  
782 (hh-Gal4; UAS-GFP) and the anterior (control) domains on five different z sections for each  
783 leg. For each z section, the mean of fluorescence intensity was measured and the ratio  
784 between posterior and anterior domains was calculated. The mean of these five ratios per leg  
785 is represented as one spot on the graph in Figure S5a.

## 786 Quantitative analysis of medio-apical myosin flow

787 Particle image velocimetry from time-lapse movies of E-cadh-GFP; sqh-RFP leg discs was  
788 quantified using the OpenPIV Python package. Images were acquired on a Zeiss LSM 880  
789 using High Resolution Airy Scan with a time frame of 15". Flows were analyzed in 2D on

790 maximum projection of standard deviation. Each cell was isolated using Image J software.  
791 The displacement of particles was tracked between successive frames and the mean  
792 displacement is presented in a polar charts in FigS5e-f. n=14 for control and n=20 for Arpc5  
793 RNAi.

#### 794 *Cartography of mechanical perturbations in silico*

795 In the simulations, each cell has assigned coordinates, allowing us to spot the positions of  
796 each mechanical perturbation (randomly generated in the model) in a rolled-out map of the  
797 fold domain.

#### 798 *Measure of in silico fold deviation*

799 We characterized the variability of fold orientation in the different sets of simulations: with or  
800 without mechanical perturbations and with or without tissue polarity. For each simulation, we  
801 spotted the position of maximal depth automatically as the point located at the minimal  
802 distance from the central axis of the tissue. We then defined its coordinates in relation to the  
803 predicted fold position and the DV axis. To calculate the real maximal deviation from the  
804 predicted fold domain, we subtracted the maximal deviation obtained without perturbation  
805 from the one obtained with perturbations for a given pattern of apoptosis. To calculate the  
806 angle formed between the fold and the proximal-distal axis, we measured the angle between  
807 the predicted fold and the line formed from fold position on the ventral side and the position  
808 of maximal depth. To calculate the real maximal angle from the predicted fold domain, we  
809 subtracted the angle without perturbation from the one obtained with perturbations for a given  
810 pattern of apoptosis.

#### 811 *Statistical Analysis*

812 The normality of the data sets was determined using Prism 8 (Graph Pad).

813 A Mann-Whitney U-test was used to assess the significance of differences in tissue recoil  
814 after laser ablation (Fig2i; Fig3c,e; Fig7h-i and FigS7a-b) or in apical intensity of MyoII  
815 (FigS5a), considering legs as independent from each other. The null hypothesis was that  
816 measurements were samples from the same distribution. Tests were performed using Prism 8  
817 (Graph Pad).

818 Variances of the phenotypes observed *in vivo* were compared using the F-test of equality of  
819 variances in Prism 8 (Graph Pad), considering that different data sets follow a normal  
820 distribution. Variances from simulated data were compared using the Levene's test in Python

821 3.7, considering that different data sets do not fit with a normal distribution. The null  
822 hypothesis was that variances of population were equal.  
823 Spearman correlation coefficients (FigS7g-h) and associated p-values were computed online  
824 ([www.wessa.net/rwasp\\_spearman.wasp](http://www.wessa.net/rwasp_spearman.wasp)).  
825

826 **Supplemental video titles**

827

828 **Movie 1.** 3D reconstruction of a control leg disc showing the expression of *Deadpan* and the fold domain  
829 (related to Fig2).

830 **Movie 2.** 3D reconstruction of an *Arpc5* RNAi leg disc showing the expression of *Deadpan* and the fold domain  
831 (related to Fig2).

832 **Movie 3.** Laser ablation experiments of apoptotic myosin II cables in *control* and *Arpc5* RNAi leg discs (Related  
833 to Fig2).

834 **Movie 4.** Laser ablation experiments of non-apoptotic apico-basal structures of Myosin II in *control* and *Arpc5*  
835 RNAi leg discs (Related to Fig3).

836 **References**

837

- 838 Akieda, Y., Ogami, S., Furuie, H., Ishitani, S., Akiyoshi, R., Nogami, J., Masuda, T.,  
839 Shimizu, N., Ohkawa, Y., and Ishitani, T. (2019). Cell competition corrects noisy Wnt morphogen  
840 gradients to achieve robust patterning in the zebrafish embryo. *Nat Commun* *10*, 4710.
- 841 Ambrosini, A., Rayer, M., Monier, B., and Suzanne, M. (2019). Mechanical Function of  
842 the Nucleus in Force Generation during Epithelial Morphogenesis. *Dev Cell* *50*, 197-211.e195.
- 843 Bertet, C., Sulak, L., and Lecuit, T. (2004). Myosin-dependent junction remodelling  
844 controls planar cell intercalation and axis elongation. *Nature* *429*, 667-671.
- 845 Bi, D., Lopez, J.H., Schwarz, J.M., and Manning, M.L. (2015). A density-independent  
846 rigidity transition in biological tissues. *Nature Physics* *11*, 1074-1079.
- 847 Calzolari, S., Terriente, J., and Pujades, C. (2014). Cell segregation in the vertebrate  
848 hindbrain relies on actomyosin cables located at the interhombomeric boundaries. *EMBO J* *33*, 686-  
849 701.
- 850 Chesarone, M.A., and Goode, B.L. (2009). Actin nucleation and elongation factors:  
851 mechanisms and interplay. *Curr Opin Cell Biol* *21*, 28-37.
- 852 de Celis, J.F., Tyler, D.M., de Celis, J., and Bray, S.J. (1998). Notch signalling mediates  
853 segmentation of the *Drosophila* leg. *Development* *125*, 4617-4626.
- 854 Ebert, M.S., and Sharp, P.A. (2012). Roles for microRNAs in conferring robustness to  
855 biological processes. *Cell* *149*, 515-524.
- 856 Eldar, A., Shilo, B.Z., and Barkai, N. (2004). Elucidating mechanisms underlying  
857 robustness of morphogen gradients. *Curr Opin Genet Dev* *14*, 435-439.
- 858 Eritano, A.S., Bromley, C.L., Bolea Albero, A., Schütz, L., Wen, F.L., Takeda, M.,  
859 Fukaya, T., Sami, M.M., Shibata, T., Lemke, S., *et al.* (2020). Tissue-Scale Mechanical Coupling  
860 Reduces Morphogenetic Noise to Ensure Precision during Epithelial Folding. *Dev Cell*.
- 861 Fernandez-Gonzalez, R., and Zallen, J.A. (2013). Wounded cells drive rapid epidermal  
862 repair in the early *Drosophila* embryo. *Mol Biol Cell* *24*, 3227-3237.
- 863 Frankel, N., Davis, G.K., Vargas, D., Wang, S., Payre, F., and Stern, D.L. (2010).  
864 Phenotypic robustness conferred by apparently redundant transcriptional enhancers. *Nature* *466*,  
865 490-493.
- 866 Félix, M.A., and Barkoulas, M. (2015). Pervasive robustness in biological systems. *Nat*  
867 *Rev Genet* *16*, 483-496.
- 868 Georgiou, M., Marinari, E., Burden, J., and Baum, B. (2008). Cdc42, Par6, and aPKC  
869 regulate Arp2/3-mediated endocytosis to control local adherens junction stability. *Curr Biol* *18*, 1631-  
870 1638.
- 871 Gilmour, D., Rembold, M., and Leptin, M. (2017). From morphogen to  
872 morphogenesis and back. *Nature* *541*, 311-320.
- 873 Gracia, M., Theis, S., Proag, A., Gay, G., Benassayag, C., and Suzanne, M. (2019).  
874 Mechanical impact of epithelial-mesenchymal transition on epithelial morphogenesis in *Drosophila*.  
875 *Nat Commun* *10*, 2951.
- 876 Gregor, T., Tank, D.W., Wieschaus, E.F., and Bialek, W. (2007). Probing the limits to  
877 positional information. *Cell* *130*, 153-164.
- 878 Gursky, V.V., Surkova, S.Y., and Samsonova, M.G. (2012). Mechanisms of  
879 developmental robustness. *Biosystems* *109*, 329-335.
- 880 Hardway, H., Mukhopadhyay, B., Burke, T., James Hitchman, T., and Forman, R.  
881 (2008). Modeling the precision and robustness of Hunchback border during *Drosophila* embryonic  
882 development. *J Theor Biol* *254*, 390-399.
- 883 Harmansa, S., Alborelli, I., Bieli, D., Caussin, E., and Affolter, M. (2017). A  
884 nanobody-based toolset to investigate the role of protein localization and dispersal in. *Elife* *6*.

885 Harmansa, S., Hamaratoglu, F., Affolter, M., and Caussinus, E. (2015). Dpp spreading  
886 is required for medial but not for lateral wing disc growth. *Nature* *527*, 317-322.  
887 He, F., Wen, Y., Deng, J., Lin, X., Lu, L.J., Jiao, R., and Ma, J. (2008). Probing intrinsic  
888 properties of a robust morphogen gradient in *Drosophila*. *Dev Cell* *15*, 558-567.  
889 Herranz, H., and Cohen, S.M. (2010). MicroRNAs and gene regulatory networks:  
890 managing the impact of noise in biological systems. *Genes Dev* *24*, 1339-1344.  
891 Hong, L., Dumond, M., Zhu, M., Tsugawa, S., Li, C.B., Boudaoud, A., Hamant, O., and  
892 Roeder, A.H.K. (2018). Heterogeneity and Robustness in Plant Morphogenesis: From Cells to Organs.  
893 *Annu Rev Plant Biol* *69*, 469-495.  
894 Lander, A.D. (2011). Pattern, growth, and control. *Cell* *144*, 955-969.  
895 Lecuit, T., and Cohen, S.M. (1997). Proximal-distal axis formation in the *Drosophila*  
896 leg. *Nature* *388*, 139-145.  
897 Lecuit, T., and Yap, A.S. (2015). E-cadherin junctions as active mechanical integrators  
898 in tissue dynamics. *Nat Cell Biol* *17*, 533-539.  
899 Lott, S.E., Kreitman, M., Palsson, A., Alekseeva, E., and Ludwig, M.Z. (2007).  
900 Canalization of segmentation and its evolution in *Drosophila*. *Proc Natl Acad Sci U S A* *104*, 10926-  
901 10931.  
902 Major, R.J., and Irvine, K.D. (2006). Localization and requirement for Myosin II at the  
903 dorsal-ventral compartment boundary of the *Drosophila* wing. *Dev Dyn* *235*, 3051-3058.  
904 Manjón, C., Sánchez-Herrero, E., and Suzanne, M. (2007). Sharp boundaries of Dpp  
905 signalling trigger local cell death required for *Drosophila* leg morphogenesis. *Nat Cell Biol* *9*, 57-63.  
906 Manu, Surkova, S., Spirov, A.V., Gursky, V.V., Janssens, H., Kim, A.R., Radulescu, O.,  
907 Vanario-Alonso, C.E., Sharp, D.H., Samsonova, M., *et al.* (2009). Canalization of gene expression in  
908 the *Drosophila* blastoderm by gap gene cross regulation. *PLoS Biol* *7*, e1000049.  
909 Michelot, A., and Drubin, D.G. (2011). Building distinct actin filament networks in a  
910 common cytoplasm. *Curr Biol* *21*, R560-569.  
911 Monier, B., Gettings, M., Gay, G., Mangeat, T., Schott, S., Guarner, A., and Suzanne,  
912 M. (2015). Apico-basal forces exerted by apoptotic cells drive epithelium folding. *Nature* *518*, 245-  
913 248.  
914 Monier, B., Pélissier-Monier, A., Brand, A.H., and Sanson, B. (2010). An actomyosin-  
915 based barrier inhibits cell mixing at compartmental boundaries in *Drosophila* embryos. *Nat Cell Biol*  
916 *12*, 60-65; sup pp 61-69.  
917 Nishimura, T., Honda, H., and Takeichi, M. (2012). Planar cell polarity links axes of  
918 spatial dynamics in neural-tube closure. *Cell* *149*, 1084-1097.  
919 Perry, M.W., Boettiger, A.N., Bothma, J.P., and Levine, M. (2010). Shadow enhancers  
920 foster robustness of *Drosophila* gastrulation. *Curr Biol* *20*, 1562-1567.  
921 Pollard, T.D., and Beltzner, C.C. (2002). Structure and function of the Arp2/3  
922 complex. *Curr Opin Struct Biol* *12*, 768-774.  
923 Rajan, A., Tien, A.C., Haueter, C.M., Schulze, K.L., and Bellen, H.J. (2009). The Arp2/3  
924 complex and WASp are required for apical trafficking of Delta into microvilli during cell fate  
925 specification of sensory organ precursors. *Nat Cell Biol* *11*, 815-824.  
926 Rauskolb, C., and Irvine, K.D. (1999). Notch-mediated segmentation and growth  
927 control of the *Drosophila* leg. *Dev Biol* *210*, 339-350.  
928 Rauzi, M., Lenne, P.F., and Lecuit, T. (2010). Planar polarized actomyosin contractile  
929 flows control epithelial junction remodelling. *Nature* *468*, 1110-1114.  
930 Robinson, R.C., Turbedsky, K., Kaiser, D.A., Marchand, J.B., Higgs, H.N., Choe, S., and  
931 Pollard, T.D. (2001). Crystal structure of Arp2/3 complex. *Science* *294*, 1679-1684.  
932 Sato, A. (2018). Chaperones, Canalization, and Evolution of Animal Forms. *Int J Mol*  
933 *Sci* *19*.  
934 Schott, S., Ambrosini, A., Barbaste, A., Benassayag, C., Gracia, M., Proag, A., Rayer,  
935 M., Monier, B., and Suzanne, M. (2017). A fluorescent toolkit for spatiotemporal tracking of  
936 apoptotic cells in living. *Development* *144*, 3840-3846.



937                   Smith, S.J., Rebeiz, M., and Davidson, L. (2018). From pattern to process: studies at  
938 the interface of gene regulatory networks, morphogenesis, and evolution. *Curr Opin Genet Dev* *51*,  
939 103-110.

940                   van der Walt, S., Colbert, S.C., and Varoquaux, G. (2011). The NumPy Array: A  
941 Structure for Efficient Numerical Computation. *Computing in Science and Engineering* *13*, 22-30.

942                   Waddington (1942). Canalisation of development and the inheritance of acquired  
943 characters, pp. 563 – 565.

944                   Wu, J., and Cohen, S.M. (1999). Proximodistal axis formation in the *Drosophila* leg:  
945 subdivision into proximal and distal domains by *Homothorax* and *Distal-less*. *Development* *126*, 109-  
946 117.

947                   Yevick, H.G., Miller, P.W., Dunkel, J., and Martin, A.C. (2019). Structural Redundancy  
948 in Supracellular Actomyosin Networks Enables Robust Tissue Folding. *Dev Cell* *50*, 586-598.e583.

949                   Younger-Shepherd, S., Vaessin, H., Bier, E., Jan, L.Y., and Jan, Y.N. (1992). *deadpan*,  
950 an essential pan-neural gene encoding an HLH protein, acts as a denominator in *Drosophila* sex  
951 determination. *Cell* *70*, 911-922.

952

## Developmental patterning

Notch activation    Pro-apoptotic genes

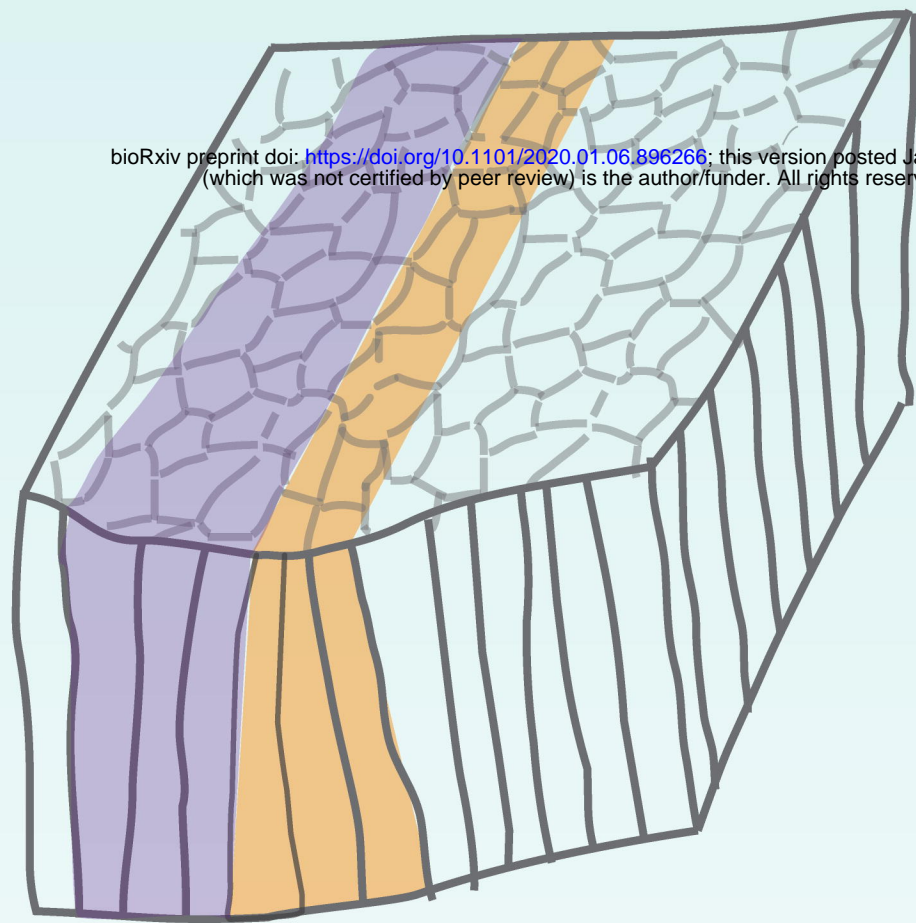

bioRxiv preprint doi: <https://doi.org/10.1101/2020.01.06.896266>; this version posted January 4, 2021. The copyright holder for this preprint (which was not certified by peer review) is the author/funder. All rights reserved. No reuse allowed without permission.

control

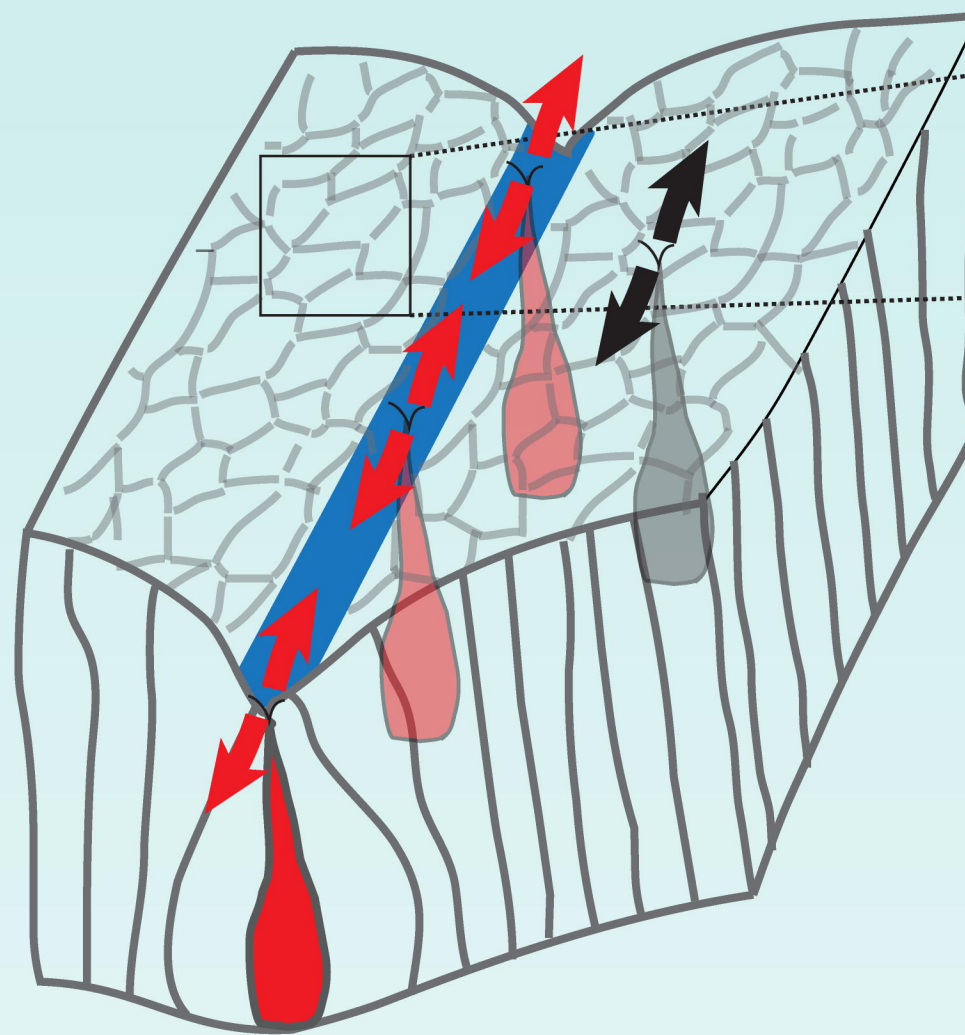

planar polarized Myosin II

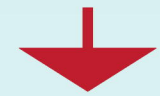

Force channeling

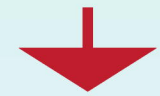

**STEREOTYPED MORPHOGENESIS**

Arp2/3 knockdown

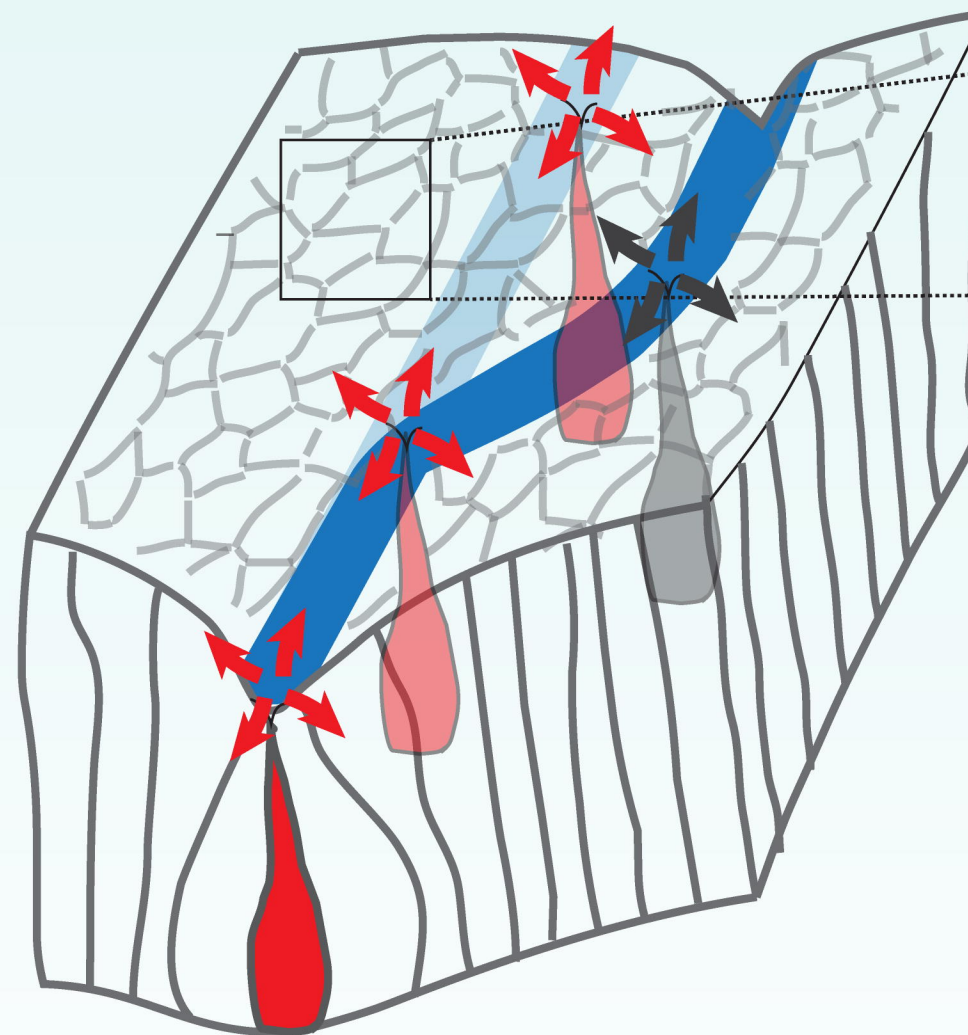

unpolarized Myosin II

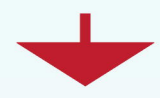

Force scattering

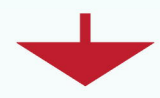

**VARIABLE MORPHOGENESIS**

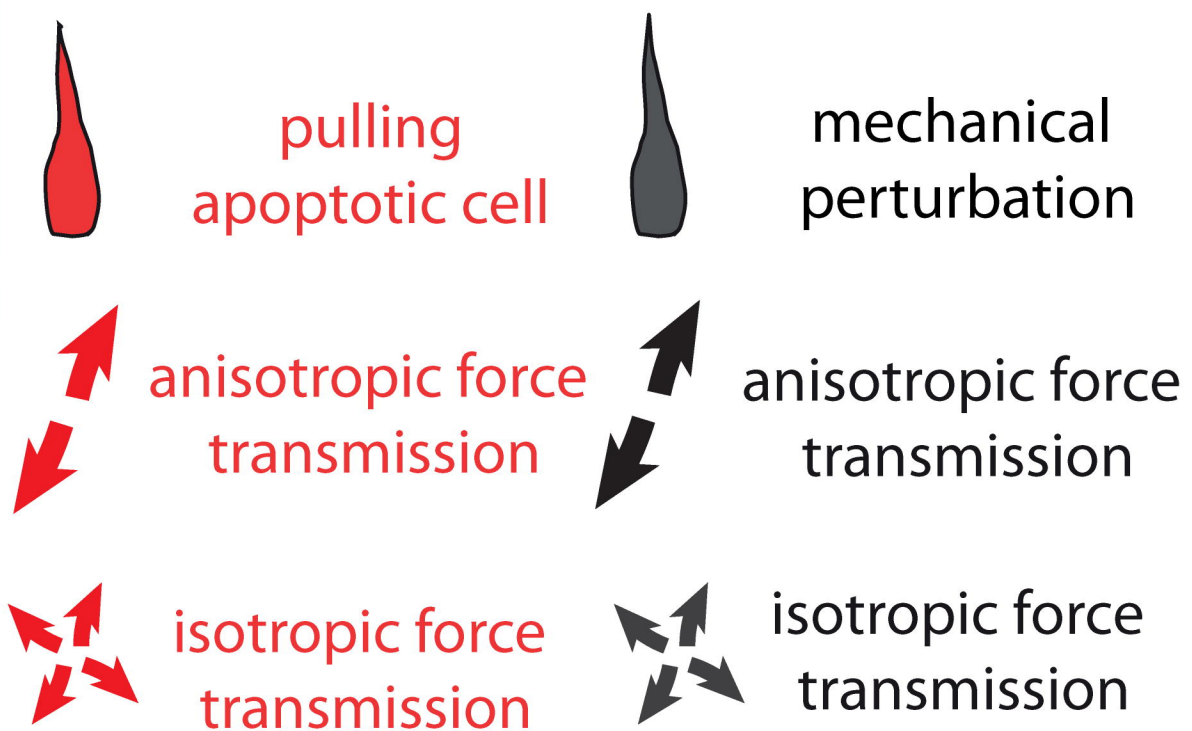

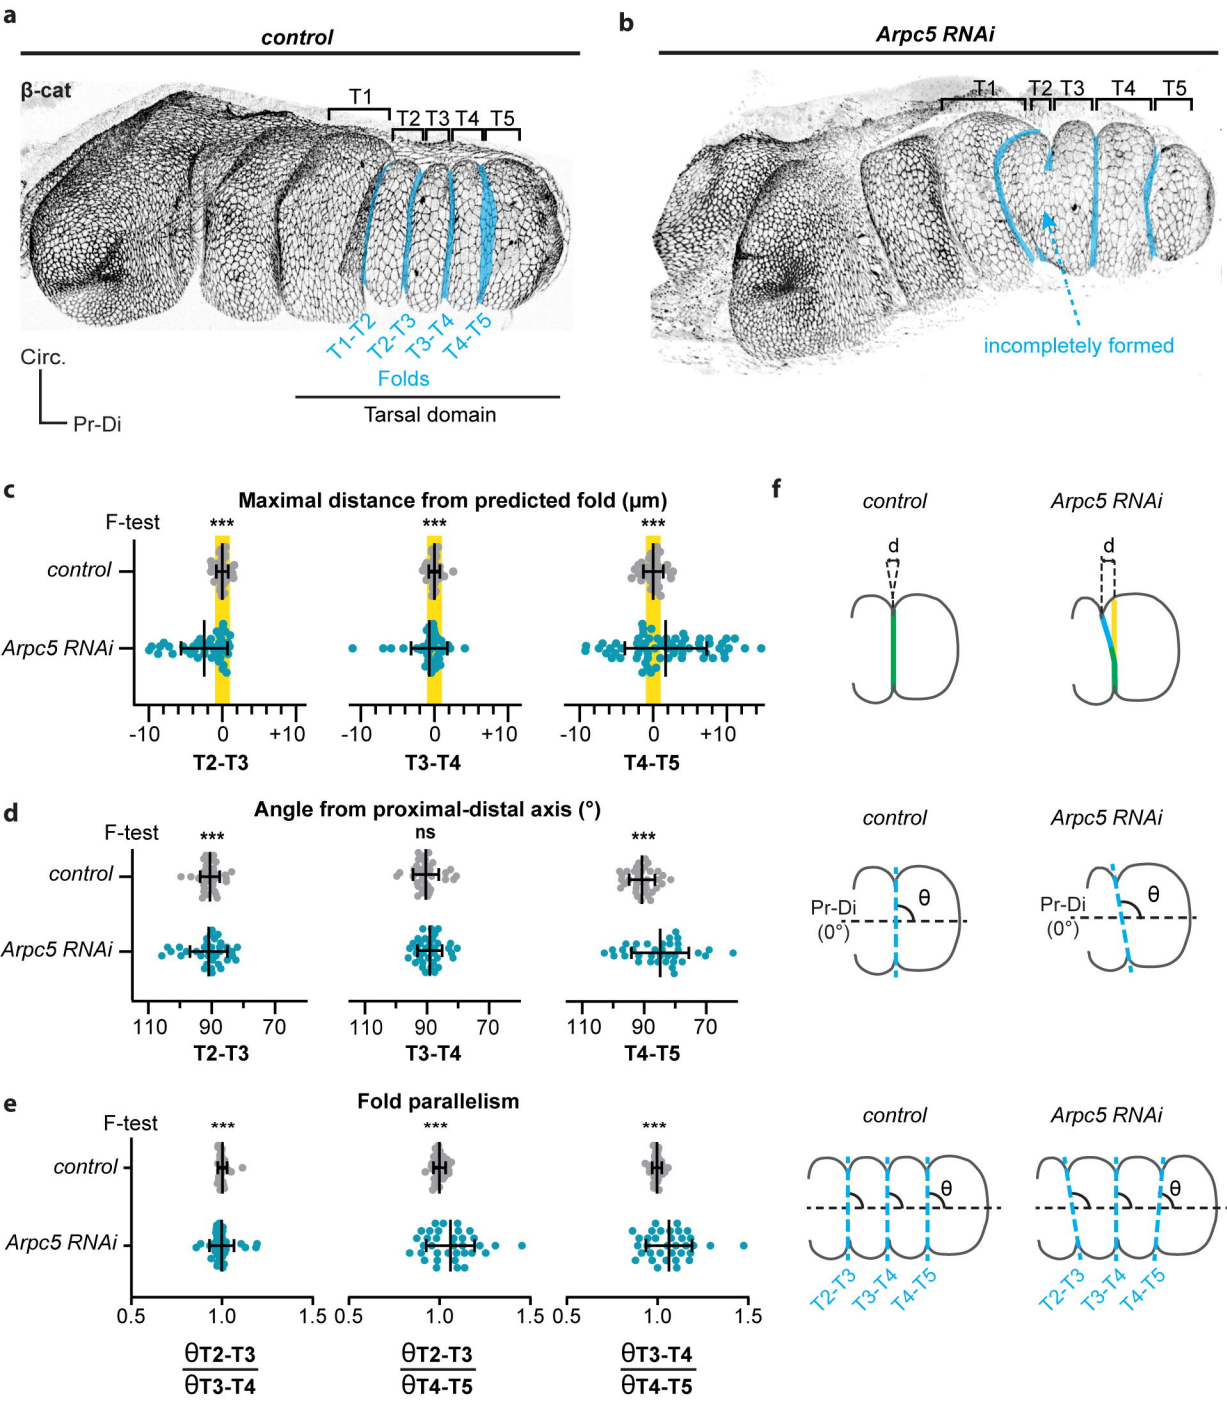

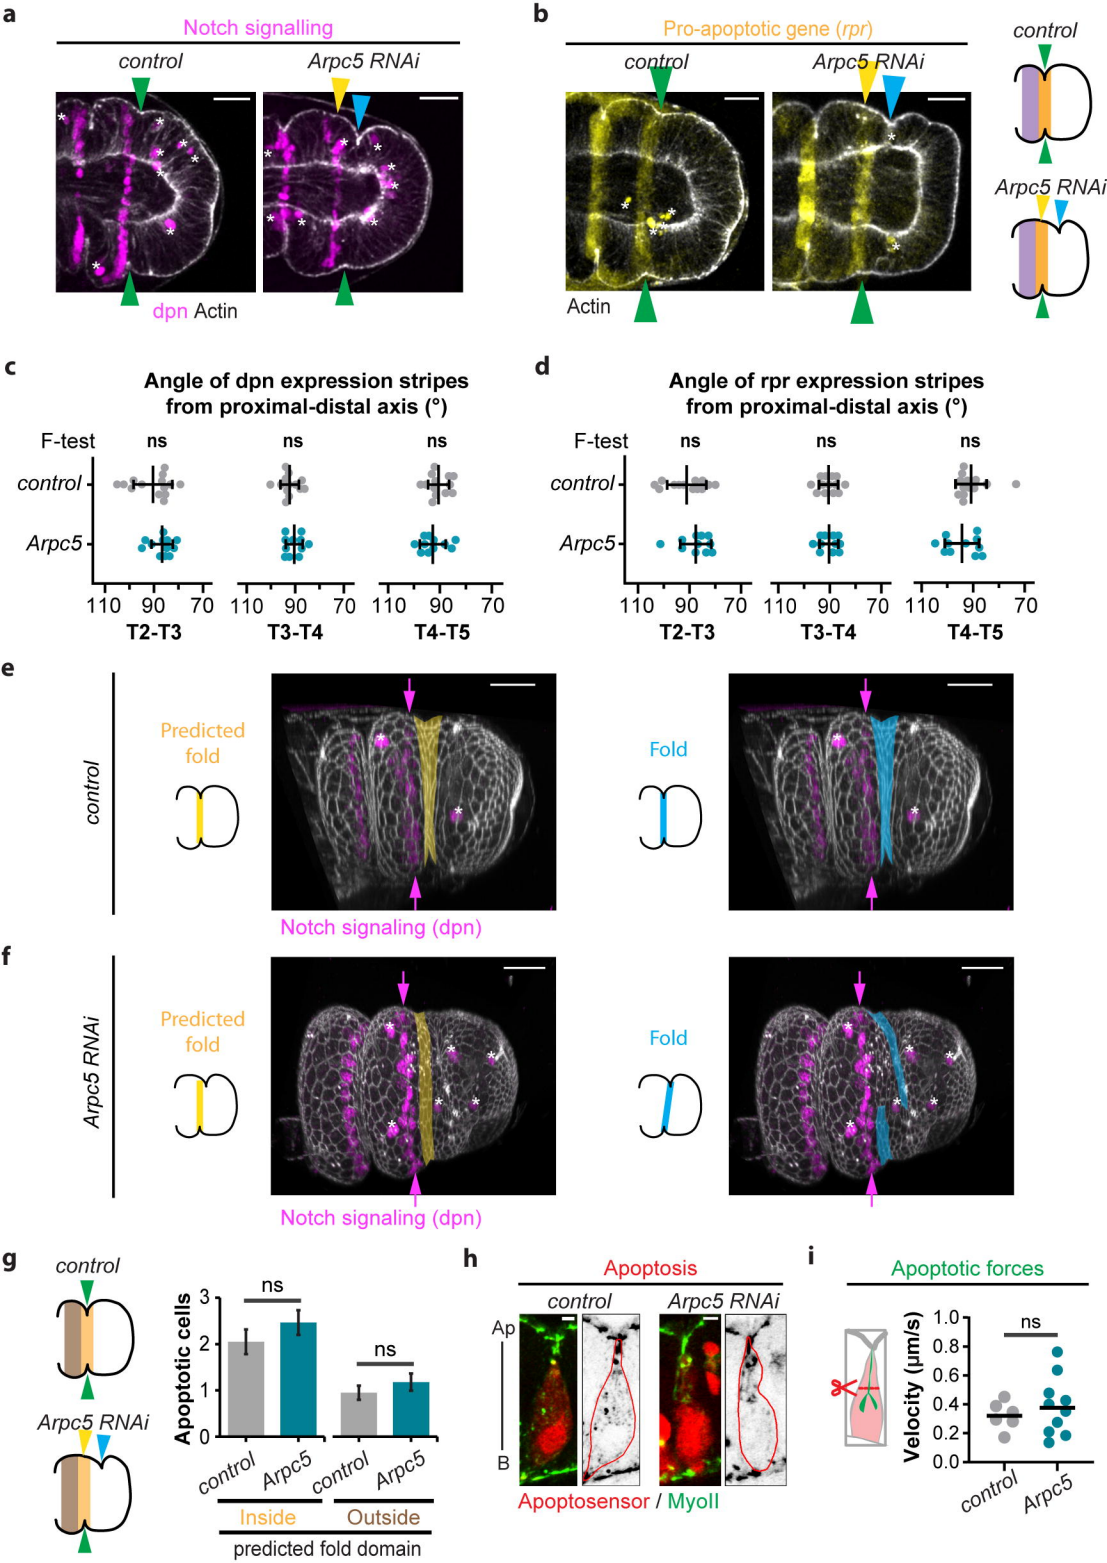

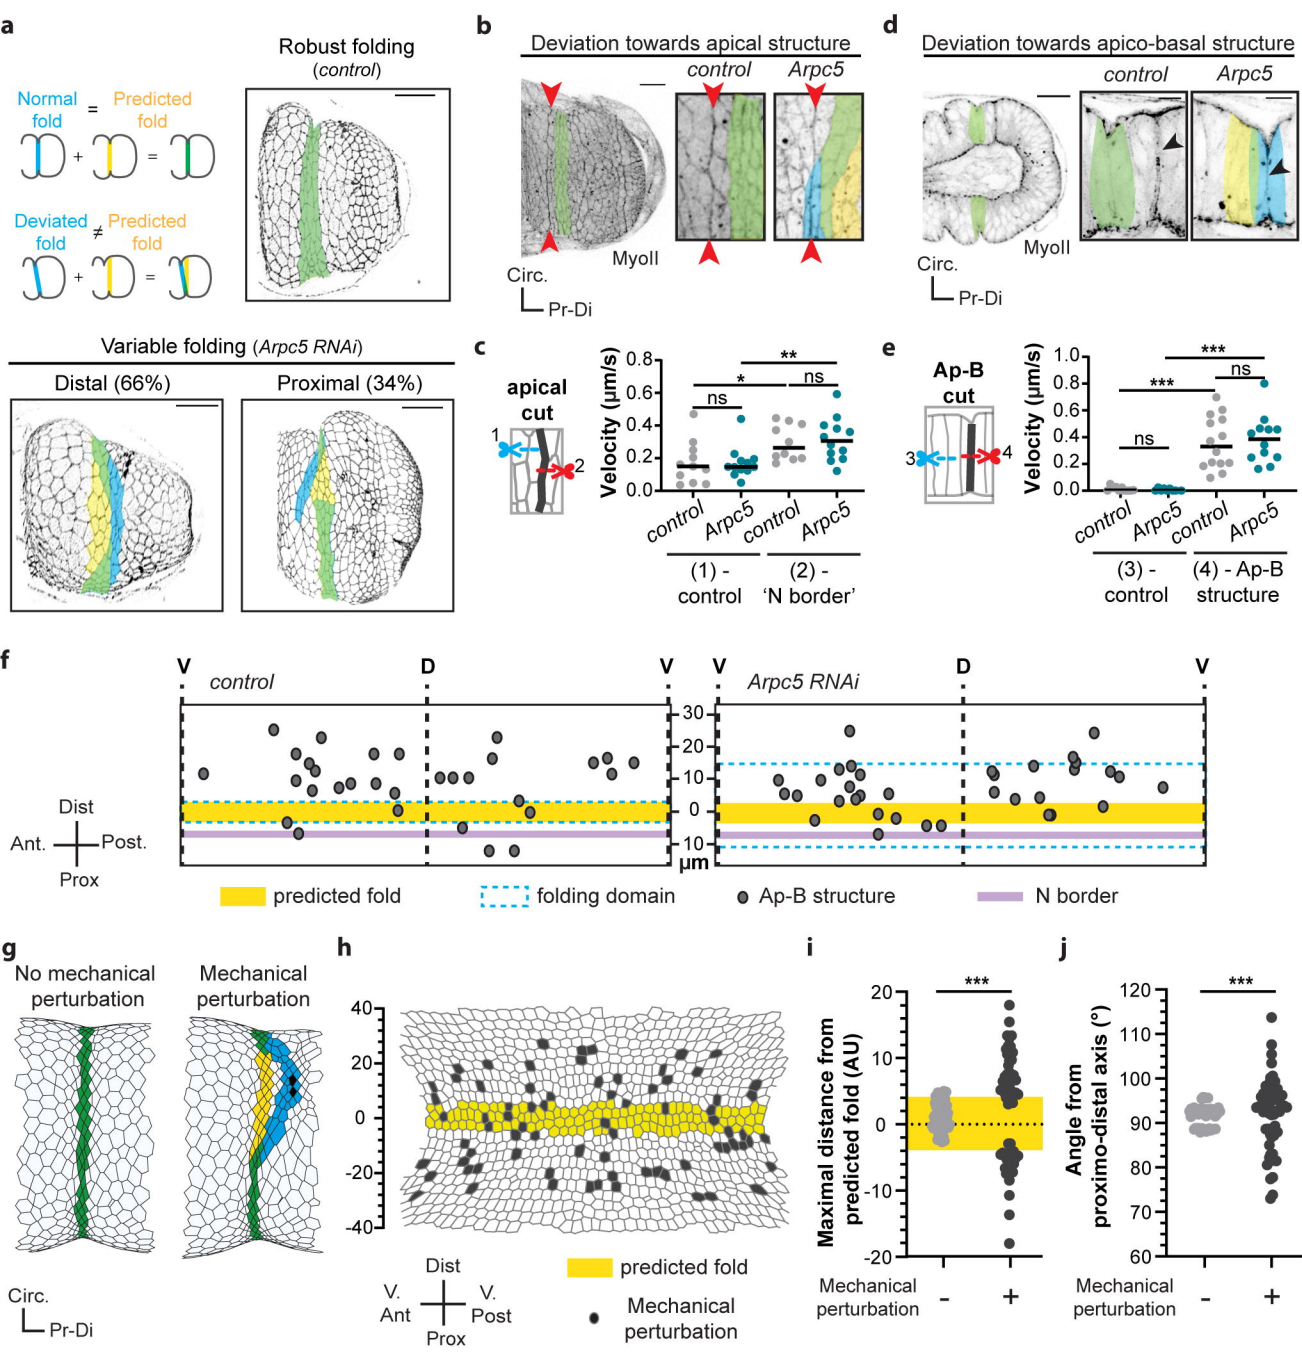

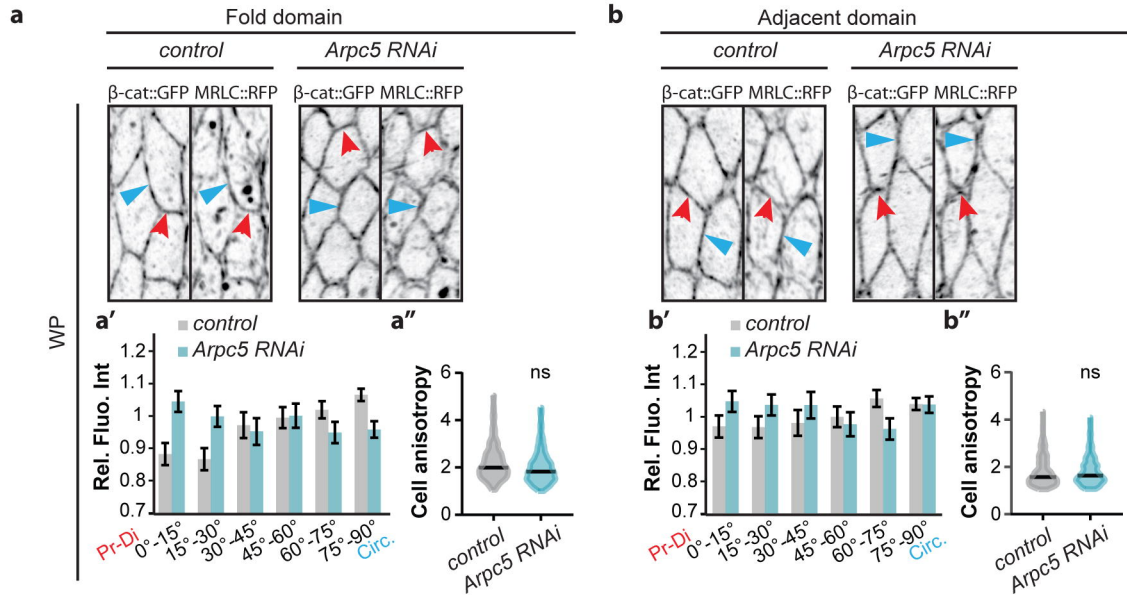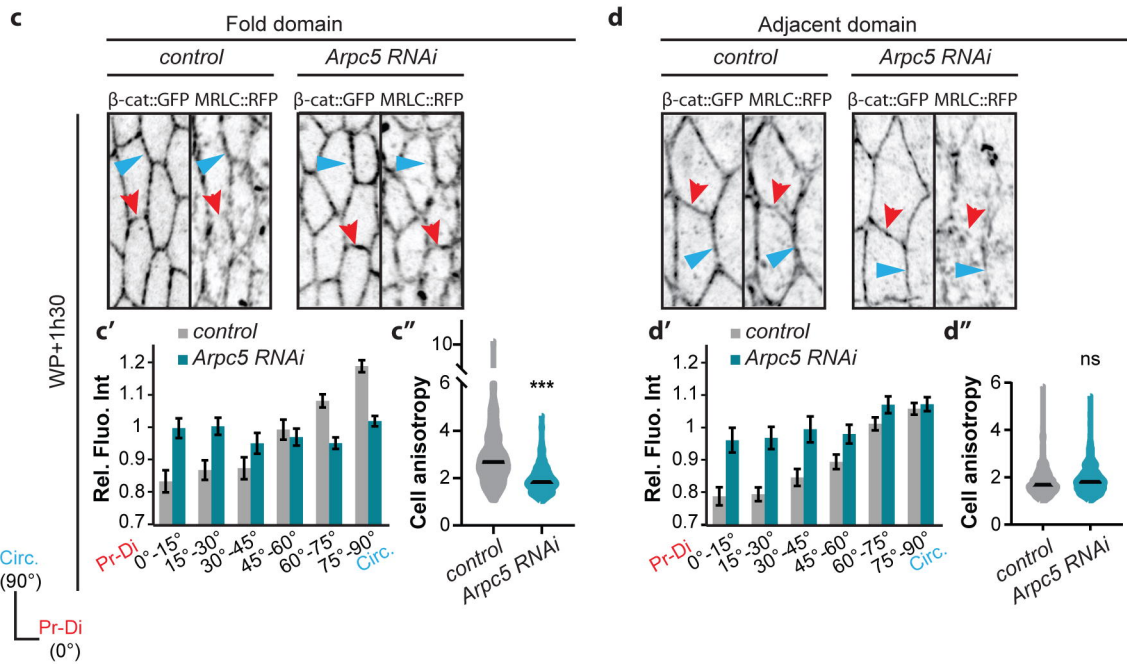

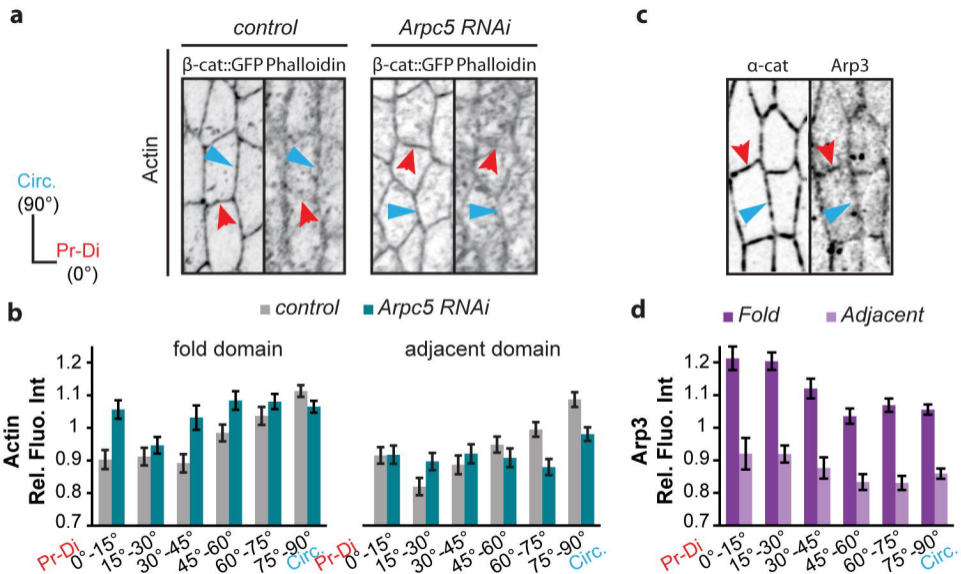

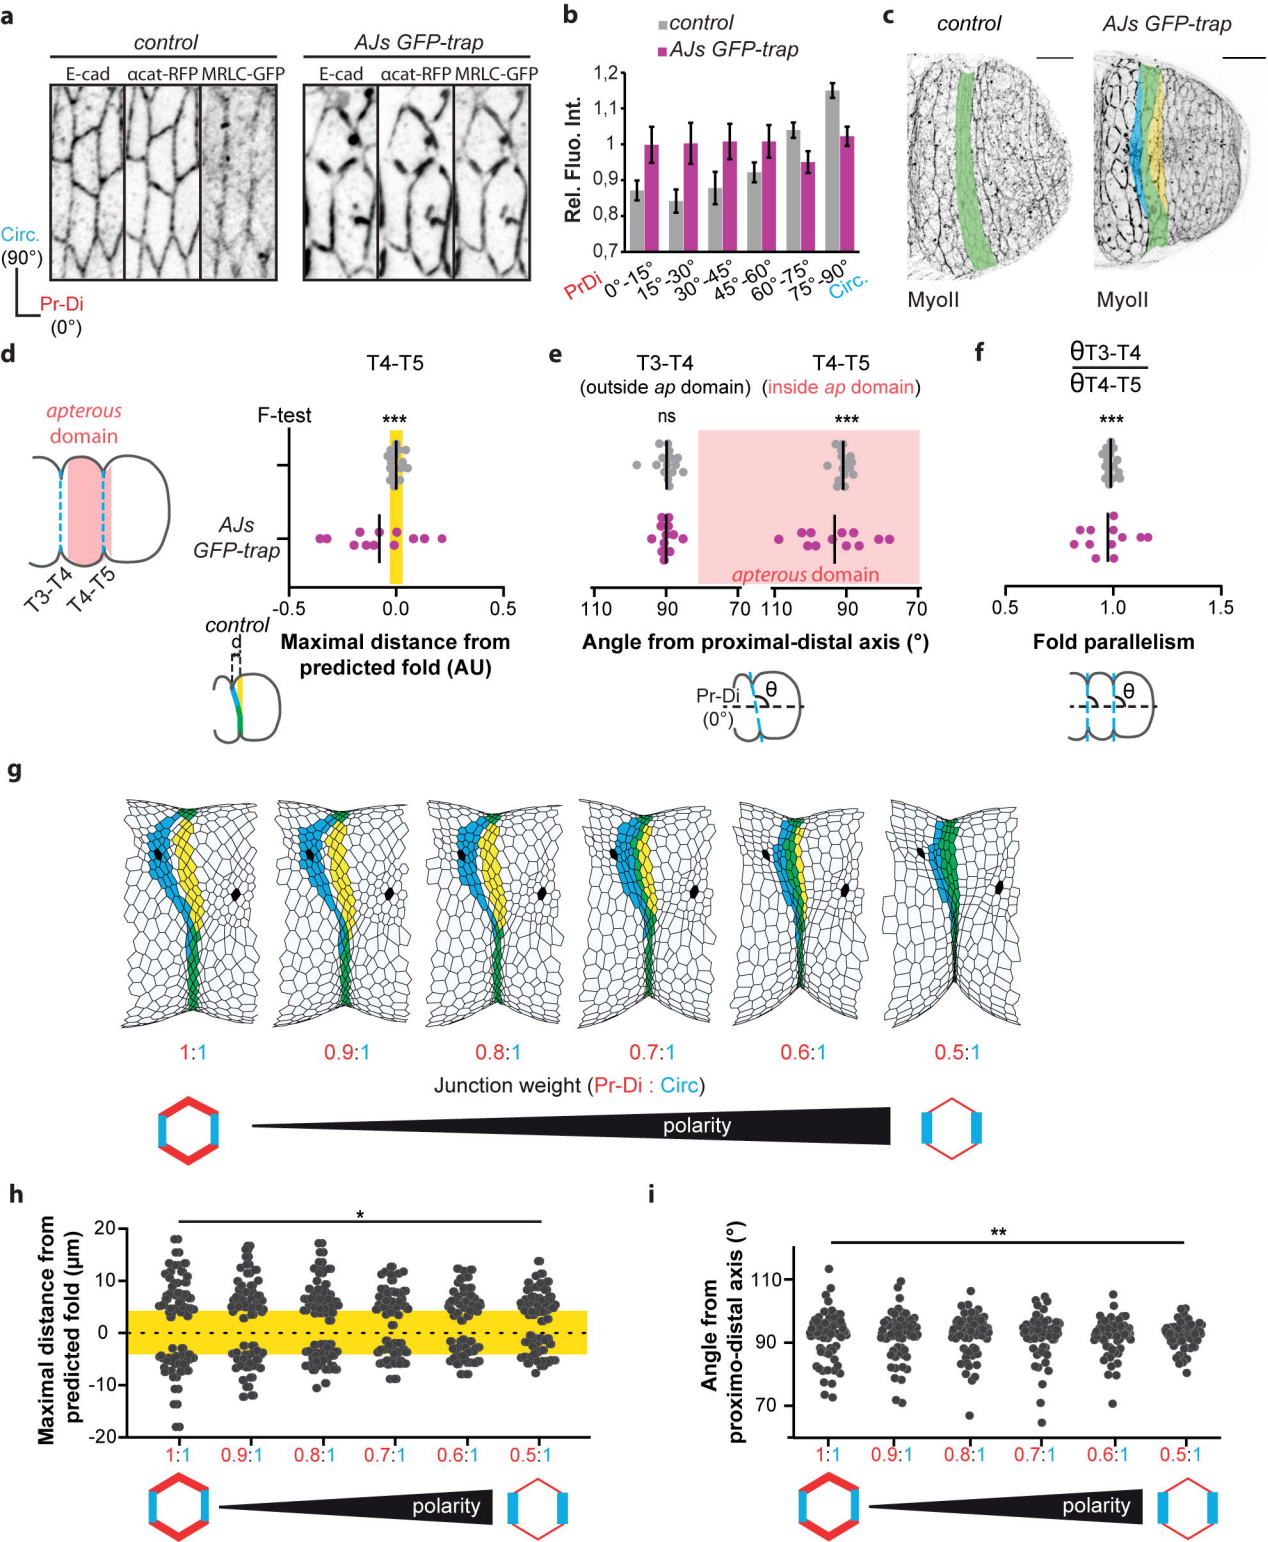



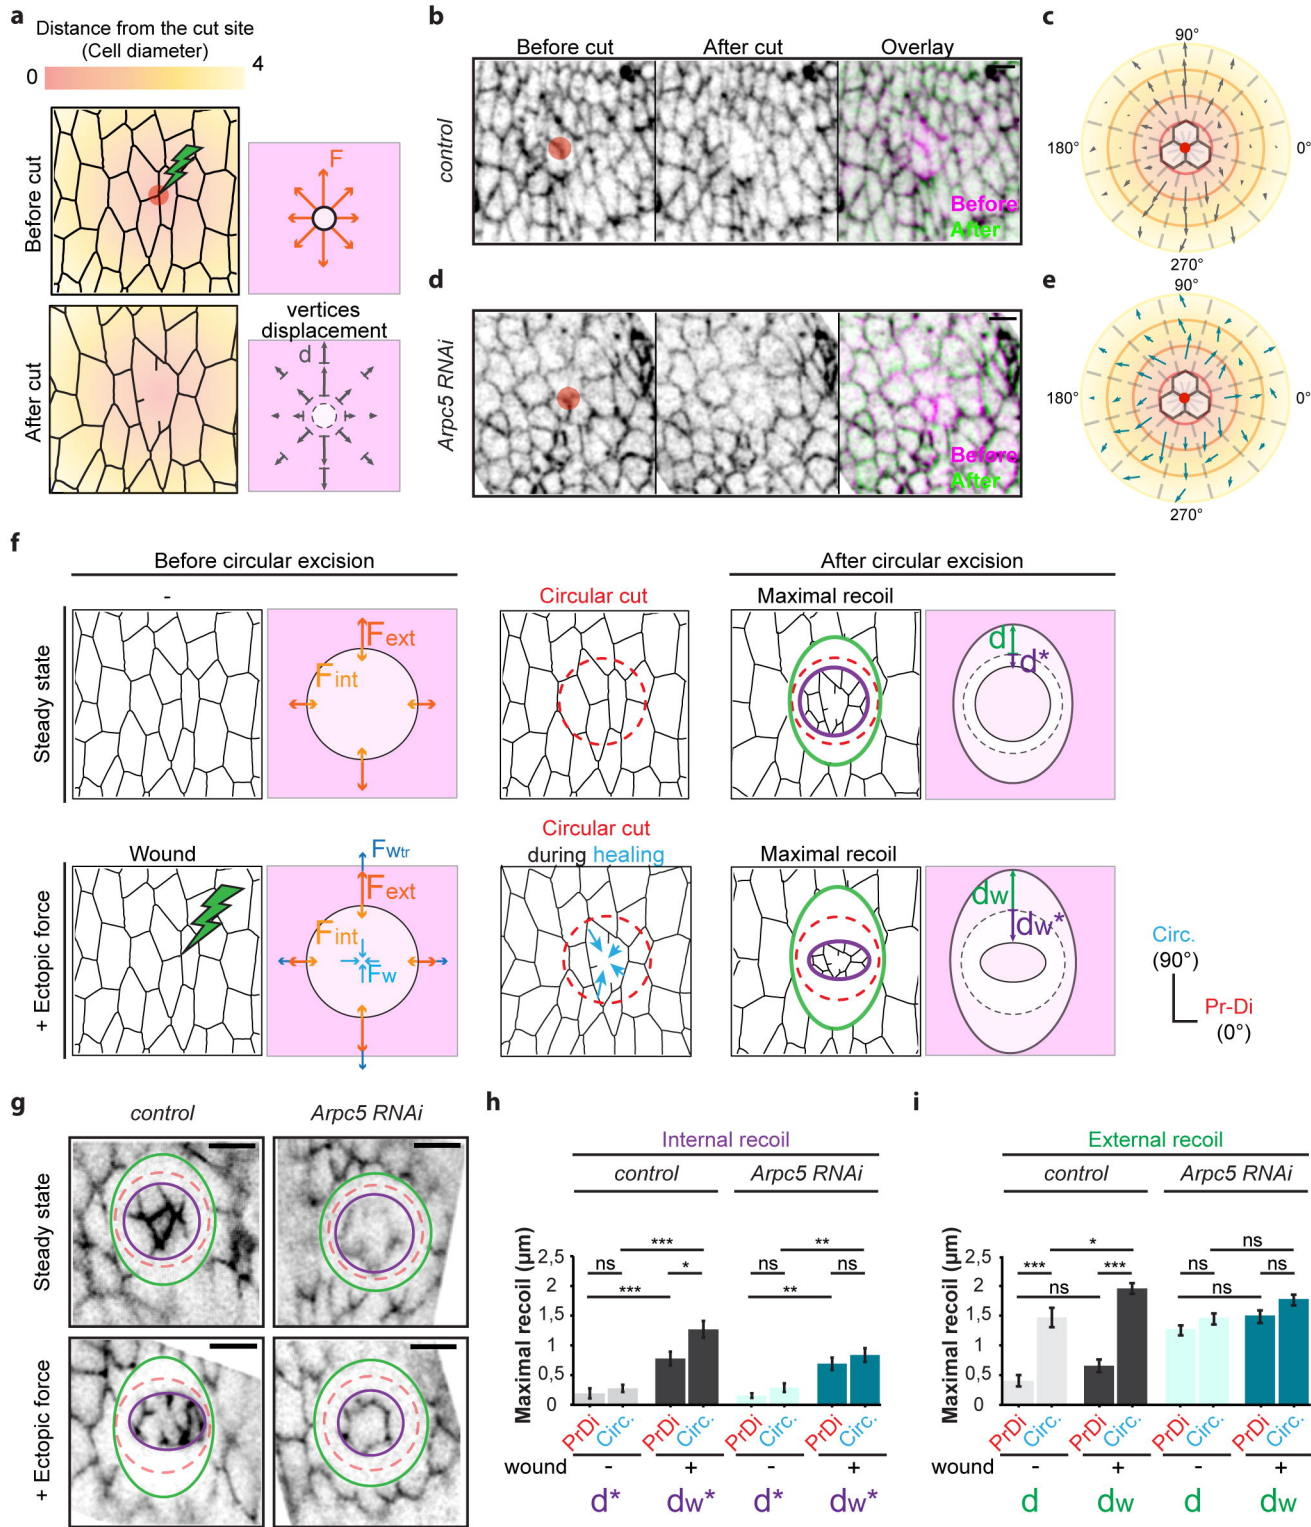

Source: https://www.biorxiv.org/content/biorxiv/early/2021/01/04/2020.01.06.896266.full.pdf
